1 ***Wolbachia* endosymbionts subvert the endoplasmic reticulum to acquire**  
2 **host membranes without triggering ER stress**

3

4 Short title: endoplasmic reticulum subversion by *Wolbachia*

5

6 Authors

7 NourFattouh<sup>1</sup>, Chantal Cazevielle<sup>2</sup> and Frédéric Landmann<sup>1</sup>

8

9 Affiliations

10

11 <sup>1</sup>CRBM, University of Montpellier, CNRS, France

12 <sup>2</sup>MRI-COMET, Plateau de microscopie électronique, U1051 INM

13 Hôpital Saint Eloi, Montpellier, France

14

15

16 Correspondence: frederic.landmann@crbm.cnrs.fr

17

18

19

20

21

22

23

24

25

26

## 27 **Abstract**

28 The reproductive parasite *Wolbachia* are the most common endosymbionts on  
29 earth, present in a plethora of arthropod species. They have been introduced into  
30 mosquitos to successfully prevent the spread of vector-borne diseases, yet the  
31 strategies of host cell subversion underlying their obligate intracellular lifestyle  
32 remain to be explored in depth in order to gain insights into the mechanisms of  
33 pathogen-blocking. Like some other intracellular bacteria, *Wolbachia* reside in a  
34 host-derived vacuole in order to replicate and escape the immune surveillance.  
35 Using here the pathogen-blocking *Wolbachia* strain from *Drosophila*  
36 *melanogaster*, introduced into two different *Drosophila* cell lines, we show that  
37 *Wolbachia* subvert the endoplasmic reticulum to acquire their vacuolar  
38 membrane and colonize the host cell at high density. *Wolbachia* redistribute the  
39 endoplasmic reticulum to increase contact sites, and time lapse experiments  
40 reveal tight coupled dynamics suggesting important signalling events or nutrient  
41 uptake. They however do not affect the tubular or cisternal morphologies. A  
42 fraction of endoplasmic reticulum becomes clustered, allowing the  
43 endosymbionts to reside in between the endoplasmic reticulum and the Golgi  
44 apparatus, possibly modulating the traffic between these two organelles. Gene  
45 expression analyses and immunostaining studies suggest that *Wolbachia* achieve  
46 persistent infections at very high titers without triggering endoplasmic  
47 reticulum stress or enhanced ERAD-driven proteolysis, suggesting that amino  
48 acid salvage is achieved through modulation of other signalling pathways.

49

50

## 51 **Author summary**

52 *Wolbachia* are a genus of intracellular bacteria living in symbiosis with millions  
53 of arthropod species. They have the ability to block the transmission of  
54 arboviruses when introduced into mosquito vectors, by interfering with the  
55 cellular resources exploited by these viruses. Despite the biomedical interest of  
56 this symbiosis, little is known about the mechanisms by which *Wolbachia* survive  
57 and replicate in the host cell. We show here that the membrane composing the  
58 *Wolbachia* vacuole is acquired from the endoplasmic reticulum, a central  
59 organelle required for protein and lipid synthesis, and from which originates a  
60 vesicular trafficking toward the Golgi apparatus and the secretory pathway.  
61 *Wolbachia* modify the distribution of this organelle to increase their interactions  
62 with this source of membrane and likely of nutrients as well. In contrast to some  
63 intracellular pathogenic bacteria, the effect of *Wolbachia* on the cell homeostasis  
64 does not induce a stress on the endoplasmic reticulum. One of the consequences  
65 of such a stress would be an increased proteolysis used to relieve the cell from  
66 an excess of misfolded proteins. Incidentally, this shows that *Wolbachia* do not  
67 acquire amino acids from the host cell through this strategy.

68

69

## 70 **Introduction**

71 The alpha-proteobacteria *Wolbachia* -*Wb*- are the most common endosymbionts  
72 encountered in nature, present in a plethora of terrestrial arthropod hosts, and  
73 in filarial nematode species. These reproductive parasites have developed a wide  
74 range of symbiotic interactions, from facultative to mutualistic [1]. In all

75 instances, they are vertically transmitted through the female germline but also  
76 colonize the soma [2]. The tissues that are infected can differ from one host  
77 species to another, as well as the *Wolbachia* intracellular titer. Although the  
78 highest titers are often observed in the germline, they vary considerably among  
79 wild isolates of specimens within a single species [3]. While *Wolbachia* intrinsic  
80 factors can be responsible for targeting specific cell types acting as reservoirs, i.e.  
81 the somatic stem cell niche in the *Drosophila* ovary [4], they can also influence  
82 the degree of intracellular replication. Such is the case for the pathogenic  
83 *Wolbachia* strain wMelpop, that possesses a region of eight genes called  
84 octomom, whose degree of amplification dictates the bacterial titer and the  
85 virulence [5]. Conversely, the host genetic background also exerts a profound  
86 influence on the bacterial ability to replicate. When the wMel strain naturally  
87 hosted in the fruit fly *Drosophila melanogaster* is transferred into the closely  
88 related *Drosophila simulans* species, mature oocytes appear dramatically more  
89 infected [6]. Therefore, depending on the permissivity of the genetic background,  
90 different cell types can harbor a wide range of endosymbiotic titers. As a  
91 consequence, the impact of a given *Wolbachia* strain on the cellular homeostasis,  
92 and the degree of subversion exerted on organelles to satisfy their obligate  
93 intracellular lifestyle can potentially induce variable phenotypes, i.e. in terms of  
94 nutrient demand, stress or cell innate immune responses.

95 These past years have seen a resurgence of interests in *Wolbachia* because they  
96 can be a drug target to fight parasitic filarial diseases [7], and because of their  
97 ability to compromise transmission of vector-borne arboviruses [8]. In the latter  
98 case, the wMel strain has been favored and introduced into mosquito vectors  
99 because it does not induce a fitness cost [9,10], allowing a spread through wild

100 populations of mosquitos. Although the mechanisms by which *Wolbachia* block  
101 the pathogen transmission are not fully understood, a clearer picture starts to  
102 emerge. However among recent studies, somewhat contradictory results have  
103 been reported, reflecting a variety of phenotypes under environmental influence  
104 (for a review see [11]). Typically, the role of *Wolbachia*-induced innate immunity  
105 priming in pathogen interference is still an object of debate, although viral  
106 replication inhibition can be achieved by wMel without inducing an upregulated  
107 expression of anti-microbial peptide genes [12,13]. *Wolbachia* depend on host  
108 nutrients such as amino acids and lipids [14,15], but they potentially provision  
109 their hosts to act in some instances as nutritional symbionts. Hence, the cost and  
110 benefit associated with a *Wolbachia* infection are certainly variable. Nonetheless  
111 their intracellular lifestyle involves a competition with viruses for subverting the  
112 same limited resources. Cholesterol and lipid homeostasis are modulated in the  
113 presence of *Wolbachia* [16] and account for their pathogen-blocking effect,  
114 limiting the viral access to these metabolites essential to their replication  
115 [17,18]. If a persistent infection with *Wolbachia* endosymbionts exerts a cellular  
116 stress, it should not affect the host viability. An Endoplasmic Reticulum -ER-  
117 stress response has been described to be associated with *Wolbachia* [18,19]. The  
118 ER is involved in lipid metabolism, protein synthesis and their proper folding as  
119 well as post-translational modifications, and is the source of vesicular trafficking  
120 with the Golgi apparatus [20]. Because of its central role in the host cell  
121 metabolism, the ER is often subverted by viruses and intracellular bacteria  
122 [21,22]. When the cell homeostasis is perturbed to the point that misfolded  
123 proteins accumulate in the ER, an Unfolded Protein Response -UPR- is triggered.  
124 In order to restore homeostasis, the ER protein folding capacity is increased

125 through chaperone release in the ER lumen and upregulation of chaperone and  
126 UPR sensor genes; translation is reduced; and an ER-associated degradation  
127 ERAD- pathway is upregulated. If the stress is prolonged, cell dysfunctions occur  
128 and cell death is eventually induced [23]. Accordingly, some intracellular  
129 bacteria have learned to subvert and control the UPR to avoid such fate [22]. It is  
130 therefore intriguing that an ER stress has been reported or suggested by some  
131 studies and up to date invoked as a consequence of a *Wolbachia* infection. More  
132 specifically, proteomic studies suggest a mild upregulation of some UPR related  
133 genes, although it should be noted that they were carried out with the life-  
134 shortening pathogenic strain wMelpop [18]. A recent study using RNAi  
135 screening in *Drosophila* cells coupled to electron microscopy observations,  
136 highlights the requirement of an ERAD ubiquitin ligase to maintain a normal  
137 *Wolbachia* titer, and reports a close subcellular vicinity between *Wolbachia* and a  
138 morphologically aberrant ER [19]. This study suggests that an ERAD-derived  
139 proteolysis is induced by *Wolbachia* to salvage amino acids. In the present study,  
140 we seek to clarify the link between *Wolbachia* and the ER by exploring the  
141 physical relationship between the endosymbiont intracellular population and  
142 this organelle at the cellular level as well as the functional consequences of a  
143 *Wolbachia* infection on the ER. To avoid cell line-specific phenotypes and to take  
144 in account the impact of the host genetic background, two cell lines showing  
145 different gene expression profiles have been infected with the same wMel strain.  
146 Specifically, live studies and observation of fixed cells reveal a complex and  
147 dynamic interaction between wMel and the ER. This organelle, and not the Golgi  
148 apparatus as previously suggested, appears to be the source of the endosymbiont  
149 vacuolar membrane. *Wolbachia* redistribute the ER without triggering

150 pathological morphologies. In addition, gene expression analyses indicate that  
151 UPR and ERAD key players are not upregulated upon *Wolbachia* infection, and  
152 immunostaining studies of ubiquitin chains with degradative roles confirm that  
153 ERAD-derived proteasomal degradation is not increased, suggesting that  
154 *Wolbachia* do not induce ER stress and proceed through subversion of other host  
155 pathways to salvage amino acids.

156

157

## 158 **Results**

159

### 160 **The host genetic background influences the *Wolbachia* titer in *Drosophila*** 161 **cell cultures.**

162 In order to gain insights into the general mechanisms of host cell subversion  
163 operated by the *Wolbachia* strain wMel in its natural host *D. melanogaster* to  
164 sustain its intracellular lifestyle, and to minimize cell line-specific phenotypes,  
165 we established new wMel infections in two *D. melanogaster* cell lines described  
166 to display distinct gene expression profiles [24]. The two selected cell lines are  
167 adherent, facilitating cellular analyses on live and fixed samples. While both cell  
168 lines express about 6,000 genes, nearly half of them show considerable  
169 expression variations between cell lines. 1182-4H is an acentriolar haploid cell  
170 line derived from maternal haploid *mh 1182* mutant embryos [25,26]. S2R+ are  
171 tetraploid male cells derived from the original Schneider's cell line [27,28]. We  
172 chose to introduce in these two different genetic backgrounds a wMel strain  
173 derived from JW18, very closely related to the wMel genome of reference [28].  
174 The infected JW18 cell line has been commonly used in numerous studies as a

175 reference cell line to explore the *Wb*-host interactions and the *Wb*- induced viral  
176 protection at the cellular and molecular levels [19,28–31]. To infect naive cell  
177 lines, wMel bacteria were purified from JW18 cell cultures and added to flasks of  
178 uninfected 1182-4 and S2R+ cells (See Methods). JW18 cells harbor fluorescent  
179 GFP-Jupiter decorated microtubules. This helped us to confirm the exclusion of  
180 cell contaminant during the infection process. After one month, we found the  
181 infection to be partial in both cell lines, and an infection dynamics time course  
182 experiment confirmed the slow progress of the infection (S1A Fig). Another  
183 round of infection was then repeated, leading to stably infected cell lines as  
184 determined by immunofluorescence with an anti-*Wolbachia* surface protein -  
185 WSP- antibody (See Methods and Fig 1A to C'), named hereafter 1182-4 *Wb* and  
186 S2R+ *Wb*. The vast majority of cells is infected in 1182-4 *Wb*, and the infection is  
187 total in S2R+ *Wb*. The *Wb* titer is also much higher in S2R+ *Wb* compared to  
188 1182-4 *Wb*, reaching several hundreds of endosymbionts per individual cells  
189 (Fig 1B',C'; S1 and S2 movies). These high *Wb* titers do not significantly affect the  
190 host cell viability (Sup1B Fig). We used the WSP-associated fluorescence area,  
191 expressed as a percentage of the total cell surface, acquired from full confocal  
192 image projections as a proxy to quantify the *Wb* titer in both cell lines (Fig 1D).  
193 We concluded that the S2R+ genetic background is more permissive to the wMel  
194 infection.

195

196 **The Golgi apparatus distribution and morphology are not affected by the**  
197 **presence of *Wolbachia*.**

198 Using a moderate and variable *Wb* titer in 1182-4 *Wb* on one hand, and a  
199 remarkably high *Wb* titer in S2R+ *Wb* on the other hand, we sought to describe



200 the influence of the *Wb* endosymbionts on the host cell physiology, taking into  
201 account the *Wb* level. The subcellular distribution of organelles is tightly linked  
202 to their function [32], and can be affected together with their morphology, by  
203 intracellular pathogens [33]. The *Wb* reside into a vacuole made of a host-  
204 derived membrane. Previously *Wb* and the Golgi cisternae were described to  
205 reside in the same subcellular compartment close to centrioles in the *Drosophila*  
206 embryo, therefore the Golgi apparatus has been proposed to be the source of the  
207 *Wb*-containing vacuole [34]. Moreover the Golgi apparatus can be subverted and  
208 fragmented by intracellular pathogens such as *Chlamydia*, that are surrounded  
209 by Golgi ministacks to facilitate lipid acquisition [35]. We reasoned that the  
210 amount, the localization and the morphology of the organelle providing  
211 membranes to the *Wb*-containing vacuoles may be potentially affected in a *Wb*  
212 titer-dependent manner. To investigate the relationship between *Wb* and the  
213 Golgi apparatus, S2R+ and acentriolar 1182-4 cells were both co-stained with an  
214 anti- *Wb* surface protein - anti-WSP- and a cis-Golgi marker -GM130-, in presence  
215 and absence of endosymbionts (Fig 2A). The Golgi apparatus typically displays  
216 cell type-specific patterns, and the cis-Golgi often appears as large foci in 1182-4  
217 cells, and as many smaller foci in S2R+ cells. When the *Wb* do not fill the entire  
218 cytoplasm, i.e. in 1182-4 *Wb* cells, a thorough visual inspection did not allow us  
219 to draw a correlation of subcellular localization between the endosymbionts and  
220 the Golgi apparatus. In addition, the number and size of GM130-positive foci did  
221 not appear influenced by the abundance of *Wb* endosymbionts in either infected  
222 cell lines (i.e. Fig 2A dashed lines for cells with either high or low *Wb* levels, and  
223 B). Unlike in a previous report establishing the Golgi apparatus as a source of  
224 vacuolar membrane, we never observed GM130-positive *Wb* vacuoles [34]. We

225 next checked the morphology of the Golgi apparatus in presence of *Wb* by  
226 ultrastructural studies (Fig 2C). The Golgi cisternae appeared properly arranged,  
227 and we could not detect any morphologies that would differ from non-infected  
228 cells, despite heavy loads of endosymbionts in the S2R+ *Wb* cell line. Together,  
229 this data set suggests that the Golgi apparatus does not appear to be subverted  
230 by *Wolbachia* at the subcellular level, and does not support the hypothesis of this  
231 organelle being a source of membrane for the endosymbionts.

232

233 ***Wolbachia* interact with the Endoplasmic Reticulum, source of their**  
234 **vacuolar membranes.**

235 A previous study based on electronic microscopy has reported observations of  
236 *Wb* in close contact with ER tubules, and in some instances a continuum between  
237 the ER and the *Wb* vacuolar membrane [19]. To better understand how and to  
238 what extent the *Wb* intracellular population interact globally with the ER, we  
239 performed simultaneous live observations of the endosymbionts and of this  
240 organelle. To this end, we used the SYTO 11 DNA live dye that stains  
241 preferentially *Wb* [36], and an ER tracker, that recognizes the sulfonylurea  
242 receptors of ATP-sensitive K<sup>+</sup> channels located on ER membranes. We first  
243 performed confocal time lapse fluorescence imaging of 1182-4 *Wb* cells. Cortical  
244 areas enriched in tubular ER were chosen for time lapse analyses because they  
245 offer a better resolution of these dynamic structures (Fig 3A). We typically  
246 observed three categories of *Wb*. Some peripheral *Wb* clusters did not show any  
247 obvious interactions with the ER (Fig 3A grey arrows), some were juxtaposed to  
248 the ER and displayed tightly coupled dynamics (Fig 3A orange arrow), while few  
249 *Wb* appeared to be localized within dynamic ER tubules (Fig 3A yellow

250 arrowhead, and see S3 movie that recapitulates these observations). We next  
251 used the same fluorescent markers in 1182-4 *Wb* and S2R+ *Wb* cells to score the  
252 different types of interaction between *Wb* and the ER (Fig 3B). Striking  
253 differences appeared in these two different cellular environments. While in  
254 random focal planes 62% of *Wb* did not reside in close ER vicinity in 1182-4 *Wb*  
255 cells, only 2% were distant from the ER in S2R+ *Wb* cells. Hence a majority -  
256 80%- of endosymbionts were in close contact with the ER in S2R+ *Wb*, while only  
257 34% contacted the ER in the 1182-4 genetic background. Interestingly 17% in  
258 S2R+ *Wb* and 9% in 1182-4 *Wb* appeared either inside the ER and/or  
259 surrounded by an ER tracker-positive membrane (Fig 3C). Together this dataset  
260 shows that the physical interaction of *Wolbachia* with the ER is highly dynamic.  
261 The presence of ER tracker around some endosymbionts strongly suggests that  
262 this organelle is a source of vacuolar membrane. Some *Wb* were detected in ER  
263 tubules, and only a minority of endosymbionts display an ER tracker-positive  
264 vacuolar membrane, leading us to hypothesize that they may represent newly  
265 acquired membranes, whose composition is subsequently modified by *Wb* (i.e.  
266 less or no ATP-sensitive K<sup>+</sup> channels leading to ER tracker-negative *Wb*  
267 vacuoles). In addition, time lapse recordings showing *Wb*-ER coupled dynamics  
268 reveal a tight physical interaction between the *Wb* vacuole and this organelle,  
269 suggesting potential signaling events and/or possible nutrient uptake. The  
270 increased association of *Wb* with the ER in a S2R+ genetic background, highly  
271 permissive to the *Wb* infection, suggests that the ability to subvert the ER is  
272 crucial for *Wolbachia* to thrive intracellularly.

273

274 **The ER subcellular distribution is affected by *Wolbachia*.**

275 Because the ER-*Wb* contacts are prominent in S2R+, we first examined the ER by  
276 confocal microscopy to assess the impact of *Wb* on its distribution. In non-  
277 infected cells, the ER appears principally composed of a dense perinuclear  
278 network of tubules and vesicles, while cisternae are less detectable. The cell  
279 periphery and cortical areas are enriched with ER tubules, which are often  
280 branched (Fig 4A). In contrast, in infected cells a fraction of the ER becomes  
281 heavily clustered close to the nucleus (Fig 4A cyan arrows), while cytoplasmic  
282 regions harboring *Wb* are highly enriched in tubular ER (Fig 4A yellow  
283 arrowheads and bottom row).

284 We defined this mass of ER as "ER clusters", which is greatly enhanced by the  
285 presence of *Wb* in both cell lines (Fig 4B). We wondered whether this ER  
286 distribution was a consequence of an ER stress, and S2R+ were treated with  
287 tunicamycin, an ER stress inducer, which did not increase the occurrence of this  
288 phenotype compared to untreated S2R+ cells (Fig 4B). ER morphological  
289 aberrations that may not be detectable by confocal fluorescence microscopy  
290 have been reported in *Wb*-infected cells such as ER tubule swelling and an  
291 increase in cisternae [19], leading us to perform EM ultrastructural studies on  
292 s2R+ *Wb* and 1182-4 *Wb* cells, and on their naive counterparts (Fig 4C,D). The  
293 dark ER mass is easily distinguishable in infected cells -thick red arrows-. A  
294 closer look at this cluster reveals it is composed of randomly - thin green arrows-  
295 and orderly -thin red arrow- packed tubules or cisternae. No swollen structure  
296 was detected within these clusters in either cell types. In the periphery, multiple  
297 *Wb* share very often a same vacuole, tightly apposed to rough ER -cyan arrows,  
298 and bottom image-. Incidentally, these multi-*Wb* vacuoles were encountered  
299 much more frequently in the highly permissive S2R+ genetic background

300 compared to 1182-4. We then searched for a size increase of cisternae and  
301 swollen ER tubules without success in S2R+ *Wb*. Measurements of ER inter  
302 membrane distances by electron microscopy however revealed very marginal ER  
303 swelling in 1182-4 *Wb*, not affecting the average thickness of ER in this cell line  
304 (Fig 4D). Last, because of the dramatic ER redistribution observed in S2R+ *Wb*  
305 occurring in more than half of these infected cells, we investigated at the  
306 individual cell level the impact of this ER defect on the Golgi apparatus  
307 distribution (Fig 4E). In non-infected cells, the Golgi foci are surrounded  
308 throughout the cell periphery by large amounts of the ER (Fig 4E left upper and  
309 lower panels, yellow arrowheads point to Golgi foci). In *Wb*-infecting cells  
310 showing ER clusters, the Golgi units do not coalesce toward the ER mass (Fig 4E  
311 right panel top images), and their distribution is not appear significantly  
312 perturbed. Although they remain associated with some ER (Fig 4E yellow  
313 arrowheads on bottom images), the overall distance between most of the ER and  
314 the Golgi apparatus is increased. In conclusion, *Wolbachia* dramatically  
315 redistribute the ER without affecting its luminal width, since we did not observe  
316 any ultrastructural variations in presence of the endosymbionts. The high titer in  
317 S2R+ *Wb* correlates with a tight association of *Wb* with the ER, and in general a  
318 large fraction of this organelle becomes spatially restricted, close to the nucleus,  
319 upon a *Wb* infection. This defect could potentially affect its function and  
320 interactions with other organelles such as the Golgi apparatus. Attempts to  
321 phenocopy the ER compaction with tunicamycin did not succeed, suggesting that  
322 this redistribution is operated by *Wb* independently of a potential ER stress.  
323

324 ***Wolbachia* do not induce ER stress in 1182-4 and S2R+ genetic**

325 **backgrounds**

326 We next sought to examine the impact of a *Wb* infection on the ER functions. To  
327 ensure protein homeostasis in the cell, one of the role of the ER is to control the  
328 proper folding and maturation of proteins through the unfolded protein  
329 response -UPR-, upregulated when misfolded proteins accumulate. When these  
330 adaptive responses are not sufficient, the endoplasmic-reticulum-associated  
331 protein degradation -ERAD- pathway is in turn activated to target and  
332 retrotranslocate ER misfolded proteins to the cytosol, where they are addressed  
333 towards a degradation pathway by the ubiquitin-proteasome machinery [37].  
334 We first checked whether the ERAD function was subverted in order to provision  
335 *Wb* with amino acids derived from an increased proteolytic activity, as  
336 previously suggested in *Wb*-infected JW18 cells [19]. We first stained cells with  
337 the FK2 antibody recognizing all mono- and polyubiquitylated proteins, but not  
338 the free ubiquitin, considered as a good proxy to assess proteasomal  
339 degradation-associated polyubiquitylation marks - K48 and K11 poly-Ub - , since  
340 these degradation marks are the most abundant among polyubiquitylated chains  
341 in the cell [38] (See Methods and Fig 5A). We quantified the total fluorescence  
342 surface associated with the polyubiquitylation foci on full confocal projections,  
343 and we found the presence of *Wb* to correlate with 2.5 and 4.2 times as many  
344 polyubiquitylation in 1182-4 and S2R+ genetic backgrounds respectively (Fig  
345 5A,B). We reasoned that a proteasomal degradation-linked poly-Ub signal,  
346 reflecting a *Wb*-dependent amino acid demand, should vary according to the  
347 endosymbiont titer, that is variable between cells in a given infected cell line. We  
348 chose the 1182-4 *Wb* cell line showing fewer heavily infected cells to perform a

349 linear regression highlighting the amount of FK2 foci in function of an increasing  
350 *Wb* titer (Fig 5C). We found no correlation between the *Wb* titer and the number  
351 of FK2 foci. This suggests that the observed FK2 signal is unlikely to account for  
352 an increased proteasomal degradation. To verify this result, we next checked  
353 specifically the levels of K11 poly-Ub chains by immunostaining analyses. K11 is  
354 the ubiquitin linkage primarily generated by the ERAD pathway [39]. We failed  
355 to detect any differences between infected and non-infected cells (Fig 5D). In the  
356 fraction of S2R+ *Wb* cells endowed with high *Wb* levels, the ER becomes  
357 clustered in an area from which the endosymbionts are excluded. Focusing our  
358 attention on these areas to detect a possible enrichment of ER-associated K11  
359 poly-Ub, we did not detect an increase of this ERAD-associated degradation mark  
360 (Fig 5D, dashed yellow circle). Both K11- and K48- linked poly-Ub chains are  
361 involved in ERAD [40], therefore we checked the levels of K48 poly-Ub, that also  
362 appeared undistinguishable in infected cells compared to their non-infected  
363 counterparts (S2 Fig.). Together these results indicate that the global increase of  
364 cellular polyubiquitylation in presence of *Wolbachia* does not reflect an increase  
365 in proteasomal degradation- associated K11/K48 polyubiquitylation marks.  
366 We decided to perform quantitative PCR analyses to investigate the UPR and  
367 ERAD responses at the gene expression level in the presence of *Wb*, in order to  
368 characterize the level of ER stress potentially generated by the endosymbionts.  
369 Briefly, upon a stress leading to accumulation of misfolded proteins, the ER  
370 transmembrane stress sensors PERK, ATF6, and IRE1 release the chaperone Bip  
371 in the ER lumen, and an UPR response is activated. This response aims at  
372 decreasing protein translation and enhancing the protein folding capacity in the  
373 ER, by upregulating the expression of chaperones and UPR sensors (Fig 6A and

374 [41]), while the ERAD pathway drives misfolded protein to undergo proteolysis.  
375 We first selected *D. melanogaster* genes confirmed to respond to tunicamycin-  
376 induced ER stress, and that are involved in both UPR and ERAD responses [42].  
377 We next monitored these candidate genes in the 1182-4 genetic background by  
378 submitting the cell line to a tunicamycin treatment for 48 hours at 10 µg/mL (Fig  
379 6B). We found a ~2 fold gene expression upregulation for the three UPR sensors  
380 *perk/gcn2*, *atf6* and *ire1* (Fig 6A, B top graphs). In addition, a number of ERAD  
381 key players, the *derlin* orthologs *der-1* and *der-2*, *sel1L/hrd3* and *hrd1/sip3*  
382 whose products associate to form a complex, as well as members of the ubiquitin  
383 ligase complex were upregulated from 3 to more than 5 folds. With this  
384 experiment validating the 1182-4 cell line responsiveness to ER stress, we next  
385 measured the impact of *Wb* on this stress in the 1182-4 *Wb* (Fig 6B bottom  
386 graphs). We did not detect any induction of the UPR sensors or downstream  
387 targets. Similarly, none of the ERAD key players that responded to tunicamycin  
388 were affected by the presence of *Wb*. This shows that *Wolbachia* do not trigger  
389 an ER stress response leading to increased UPR and ERAD activities in 1182-4  
390 *Wb* cells. Last, we verified the level of ER stress in S2R+ *Wb* cells using a  
391 fluorescent ATF-4 activity reporter gene -the translational inhibitor 4E-BP- that  
392 responds to the PERK/GCN2- ATF4 pathway through ATF4 binding sites [43].  
393 The fluorescence was monitored 48 hours after transfection with the 4E-BP  
394 intron dsRed reporter, and a tunicamycin treatment was added as a positive  
395 control of ER stress (Fig 6C, and Methods). Transfected cells showed in presence  
396 of tunicamycin high nuclear and cytoplasmic fluorescence levels. Quantification  
397 of the fluorescence revealed a level of ATF4 signaling activity upon ER stress 4  
398 times higher on average compared to non-treated S2R+ cells. The fluorescence



399 levels expressed in S2R+ *Wb* cells appeared similar to what observed in S2R+  
400 cells, suggesting that the presence of *Wb* do not cause a significant stress in the  
401 S2R+ genetic background. Altogether, this data set suggests that in these two  
402 host cell genetic backgrounds, the *Wolbachia* can proliferate and persist in a  
403 stable manner without triggering ER stress and in particular the ERAD pathway,  
404 implying that other mechanisms than ERAD-induced proteolysis should exist to  
405 salvage amino acids.

406

## 407 **Discussion**

408

409 A number of studies these past years have started to investigate the basis  
410 of the *Wb* intracellular lifestyle and their impact on the cell homeostasis using *in*  
411 *vitro* cell culture models (i.e. [13,16,18,19,44,45]). The results of these studies  
412 can be variable depending on the *Wb* strain and the infected insect cell lines. In  
413 order to minimize the bias of a cellular context potentially leading to cell line-  
414 specific phenotypes, we infected two genetic backgrounds presenting an  
415 important variation at the level of the expressed genes [24]. Additionally, the two  
416 cell lines were infected with a single wMel strain, that derives naturally from *D.*  
417 *melanogaster*.

418 Here we identified the endoplasmic reticulum as a source of vacuolar  
419 membranes for *Wolbachia* in *D. melanogaster* species, and we observed close  
420 appositions between the replicative vacuole of these endosymbionts and the ER  
421 membrane. These appositions are likely to lead to the biogenesis of ER-derived  
422 *Wb* vacuoles, while sometimes allowing fusion with this organelle. Coupled  
423 dynamics between *Wb* and the ER tubules seen in time lapse microscopy reveals

424 tight and prolonged interactions, supporting as well the possibility of nutrient  
425 uptake from the ER. The cellular context greatly influences the *Wb* titer, and a  
426 permissive environment correlates with more apposition events with the ER,  
427 suggesting that the ability of *Wb* to subvert the ER in a given environment  
428 correlates with growth and replication. A *Wb* infection redistributes the ER, and  
429 while a tubular network associates with the endosymbionts, a significant fraction  
430 of this organelle shrinks to become compacted close the cell nucleus. Although  
431 the functional impact of this ER clustering remains unclear, the ultrastructural  
432 ER organization does not reveal swollen compartments or more cisternae. Gene  
433 expression analyses of central ER stress players, as well as immunofluorescent  
434 studies of ERAD-induced proteolysis key marks indicate that the *Wb*-induced ER  
435 subversion does not trigger the UPR nor an increased proteolysis. Hence the *Wb*  
436 level, whether low or high, does not seem to perturb the ER-regulated  
437 mechanisms of cell homeostasis in a significant manner. Incidentally, these  
438 results indicate that *Wb* is likely to rely on other sources than ERAD-induced  
439 proteolysis to salvage amino acids.

440         The *Wolbachia* endosymbionts are transmitted vertically in their  
441 arthropod or filarial nematode hosts, from mothers to their offspring. Once in the  
442 egg they next colonize specific somatic tissues and the germline during  
443 embryonic and larval developmental stages, following asymmetric segregation  
444 during cell mitotic divisions [2]. Although a germline tropism has been  
445 described, implying that *Wb* can pass from cell to cell either artificially in  
446 *Drosophila* through abdominal injections of purified *Wb*, or through a  
447 developmentally regulated colonization of the filarial nematode ovary [46,47],  
448 they do not share with most intracellular pathogens the ability to easily infect

449 naïve cells, thus limiting their horizontal transfers. It has been demonstrated that  
450 *Wb* can pass from infected to non-infected cell in *in vitro* assays, without  
451 requiring cell-to-cell contact, possibly through secretion [30]. If active  
452 mechanisms of cell entry are not precisely described, passive uptake  
453 mechanisms through phagocytosis explain at least in part their entry in cell  
454 culture assays. To optimize the infection of naïve cell lines, we set up a protocol  
455 of *Wb* enrichment from a *Wb*-infected cell culture. This allowed us to expose cells  
456 to very high bacterial concentrations. Although *D. melanogaster* cell cultures  
457 have a strong capacity of engulfment –which does not make them an ideal model  
458 to study mechanisms of bacterial cell entry-, artificial infections of naïve cell  
459 culture with *Wolbachia* remain nonetheless a slow process. The fact that a  
460 significant proportion of cells remained uninfected after one month suggests  
461 indeed that extracellular *Wb* originating from possible secretion or dead cells do  
462 not have strong infection capacities and that colonization of a naïve environment  
463 remains a challenge. This is in part due to their slow replication cycle estimated  
464 to last 14 hours [48], but it is also very likely that some *Wb* do not succeed in  
465 escaping autophagy. Those nonetheless succeeding at surviving and replicating  
466 not only need to modify the phagosome membrane along the endocytic pathway  
467 to avoid the cell surveillance, but also need to acquire new membranes and  
468 nutrients.

469         The ER represents a nutrient-rich compartment devoid of antimicrobial  
470 functions, and several intracellular bacteria derive their vacuole from, and/or  
471 replicate in, this organelle [49]. Such is the case of *Legionella pneumophila* and  
472 *Brucella abortus* that possess like *Wb* a type IV secretion system they employ  
473 upon infection to secrete an array of effectors subverting cellular machineries to

474 gain access to ER. *L. pneumophila* regulate membrane trafficking through  
475 modulations of GTPase signalling pathways interfering with early secretory  
476 vesicles to ultimately allow fusion of the *Legionella* vacuole with ER-derived  
477 membranes [50]. Along the endocytic pathway, *B. abortus* co-opt the ER exit sites  
478 –ERES-, involved in the vesicular trafficking towards the Golgi., thus acquiring an  
479 ER-derived vacuolar membrane [51]. Similar to observations of these pathogens,  
480 our ultrastructural studies have revealed a tight association of *Wb* with rough ER  
481 membranes. In addition, live experiments have demonstrated that some *Wb*-  
482 containing vacuoles appear positive for a fluorescent and specific ER tracker, and  
483 in some instances *Wb* were located within ER tubules, strongly suggesting that  
484 the ER is a source of membrane for *Wb*. We hypothesize that the presence of ER  
485 tracker-negative *Wb*-containing vacuoles indicates a maturation process in the  
486 biogenesis of the membrane surrounding *Wb*, although we cannot rule out other  
487 sources of membranes. The compaction of ER observed in both 1182-4 *Wb* and  
488 S2R+ *Wb* cell lines places *Wb* in between ER and the Golgi apparatus, which  
489 could potentially favors *Wb* interactions with the ERES. *Wb* could benefit from  
490 co-opting the COPII vesicles routing towards the Golgi to acquire membranes,  
491 lipids and other nutrients. This is in accordance with the discovery that in  
492 presence of the pathogenic strain Wmelpop, cholesterol homeostasis is affected  
493 [18]. Not only *Wb* likely incorporate cholesterol into their membranes as a  
494 substitute for lipopolysaccharide, but also proper ER-to-Golgi vesicular  
495 trafficking requires cholesterol [52]. Hence *Wb* may interfere with the  
496 anterograde trafficking. In addition, a lipidomic analysis has shown that the  
497 wMel affect the sphingolipid metabolism and deplete mosquito cells from  
498 ceramide and derived sphingolipids [16]. Ceramides are synthesized in the ER

499 and exported to the Golgi [53]. They play an important role during bacterial  
500 infections as part of a pro-apoptotic lipid signalling [54] and sphingolipids  
501 regulate autophagosome biogenesis and endocytic trafficking [55], suggesting  
502 that a *Wb*-induced decreased availability of these lipids may prevent xenophagy  
503 and/or apoptosis. It is then possible that the interaction of *Wolbachia* with the  
504 ER and the derived intracellular vesicular trafficking plays also a central role in  
505 immune escape and control of apoptosis. In S2R+ *Wb* cells, the bacterial titer is  
506 exceptionally high compared to other infected insect cell lines, and *Wb* often fill  
507 the cytoplasm entirely when observed in confocal microscopy with an anti-WSP  
508 staining. In this cellular environment unable to efficiently control the *Wb* titer,  
509 electron microscopy analyses revealed a high frequency of poly *Wb*- containing  
510 vacuoles, possibly resulting from a limited access to new membranes. It is  
511 nonetheless interesting to observe that under these conditions the infection is  
512 persistent and does not compromise the host cell viability. Since ER tracker-  
513 negative *Wb* are often observed in the cell periphery, the interaction with ER  
514 may be necessary for an active replication.

515 *Wb* infections are usually characterized by very high intracellular loads of  
516 bacteria, usually above a hundred bacteria per cell, similar to other Rickettsiales.  
517 Despite the peculiar relationship between *Wb* and the ER, we did not detect an  
518 ER stress above levels found in non-infected cells suggesting that a *Wb* infection  
519 either does not require this cell response or is able to prevent it. Moreover,  
520 prolonged ER stress leads to cell death and seems incompatible with  
521 endosymbiosis [56,57]. This conclusion is in addition justified by several lines of  
522 evidence. First, although the ER appears redistributed, we did not detect  
523 morphological signs of enhanced ER activities linked to ER stress, such as

524 swollen tubules and cisternae, in contrast to a previous study performed with  
525 wMel-infected LDW1 cells [19]. Second, we monitored the gene expression levels  
526 for the three UPR sensors, downstream targets, and ERAD key players, either by  
527 quantitative PCR or by fluorescent assay approaches. We could not find altered  
528 gene expressions indicating that a persistent *Wb* infection triggers an ER stress.  
529 Last, immunofluorescence studies of polyubiquitin linkages associated with  
530 ERAD-driven proteolysis (K11 and K48 polyUb) revealed that these marks are  
531 not increased in presence of *Wb*. Since the monoclonal antibody FK2 targets all  
532 covalently linked mono- and poly-ubiquitins, it is likely that the increased  
533 amount of FK2 foci in presence of *Wb* corresponds to either mono-ubiquitylated  
534 proteins; and/or to proteins decorated with polyubiquitin chains on possibly the  
535 five other lysine residues of ubiquitin with non-degradative roles, reported to be  
536 involved in: K6 -mitophagy-, K27 -protein secretion and autophagy-, K63 -  
537 endocytosis, signalling, activation of NF-kappa-B-; K33 -kinase modification-, and  
538 K29 -lysosomal degradation- [38]. It is hence possible that *Wolbachia*, directly or  
539 indirectly, influence a number of cellular mechanisms through modulation of  
540 polyubiquitylation-dependent signalling events, and this field remains to be  
541 explored. Recent proteomic studies provide conflictual evidence regarding *Wb*  
542 and the UPR, possibly due to the differences in the *Wb* strains and the host cells  
543 employed. The pathogenic strain wMelpop slightly increases (up to 1.36 fold)  
544 some UPR-related genes identified by gene ontology analysis [18] while the wStr  
545 infection in *Aedes albopictus* cells rather leads to a decrease of proteins involved  
546 in ER protein folding [44]. Nonetheless a genome-wide RNAi screen has revealed  
547 the importance of UBC6, an ubiquitin-conjugating enzyme part of the ERAD  
548 pathway, to sustain the wMel titer [19]. Although we found no evidence for an

549 increased ERAD-induced proteolysis through ubiquitin-targeted proteasomal  
550 degradation in presence of *Wb*, this does not rule out the requirement of intact  
551 UPR/ERAD response for *Wb* survival. Alternatively, UBC6 may either be  
552 involved in a non-ERAD-related function, or since the *Wb* vacuolar membrane  
553 appears ER-derived, these endosymbionts may have subverted an ERAD  
554 machinery at the level of their own vacuole. The apicoplast of apicomplexan  
555 parasites is an organelle derived from an algal endosymbiont that has retooled  
556 the host ERAD into an apicoplast-localized ERAD-like protein import machinery  
557 [58].

558 The UPR response can be modulated by intracellular pathogens to their  
559 advantage, and the three branches –IRE1, PERK, ATF6- can be individually  
560 upregulated or inhibited in order to modulate i.e. the host defense through  
561 apoptosis or innate immunity response, or to build a replicative niche [59].

562 Hence, further investigations will be needed to clarify the role of the UPR in a  
563 *Wb* infection. However, the absence of an enhanced ERAD-proteasomal  
564 degradation pathway suggests that amino acid salvage does rely on mechanisms  
565 other than an increased proteolysis. Several studies have shown that the *Wb*  
566 infection decreases the global protein translation in the host cell [28,44]. While  
567 the mechanisms are still unknown, TORC1 and insulin pathways regulate protein  
568 translation based on environmental conditions, and greatly influence the *Wb*  
569 titer in *Drosophila* [60]. Future studies will determine whether *Wolbachia* can  
570 directly subvert growth signalling pathways to down-regulate translation and  
571 therefore increase the pool of free amino acids.

572 In conclusion, there is no doubt that in an effort to elucidate the mechanisms of  
573 intracellular survival employed by *Wolbachia*, the comprehension of subversion

574 strategies will be key: how are ubiquitylation pathways modulated and what are  
575 their targets? How do *Wb* acquire ER-derived membranes on one hand, and how  
576 do they modulate signalling or synthesis pathways to acquire amino acids and  
577 lipids on the other hand? These are the next questions to be addressed. In  
578 parallel, the current growing efforts to express the putative *Wb* effectors into  
579 surrogate systems, yeast or *Drosophila* cell cultures, should accelerate our  
580 knowledge of one of the most commonly encountered endosymbiont.

581

582

583

## 584 **Methods**

### 585 *Cell lines.*

586 All the cell lines are derived from primary cultures of *D. melanogaster* cells. JW18  
587 is a kind gift from William Sullivan [61], 1182-4 was obtained from Alain Debec  
588 [25,26], and S2R+ from François Juge [27]. JW18, 1182-4, and 1182-4*Wb* cells  
589 were maintained in a Shields and Sang M3 insect medium (Sigma) supplemented  
590 with 10% decomplexed fetal bovine serum and were passaged twice a week  
591 at a 1/4 dilution. S2R+ and S2R+*Wb* cells were maintained in a Schneider insect  
592 medium (Dominique Dutscher) supplemented with 10% decomplexed fetal  
593 bovine serum and were passaged twice a week at a 1/2 dilution. Cell lines were  
594 kept at 25°C.

595

### 596 *Extraction of Wolbachia from cell cultures.*

597 The content of ten 25 cm<sup>2</sup> cell culture flasks reaching confluency with *Wolbachia*-  
598 infected JW18 adherent cells was pooled in two 50 mL Falcon tube and



599 centrifuged at 1200 rpm for 5 minutes at room temperature. Next, each pellet  
600 was resuspended by pipetting on ice with 3 ml of pre-cooled Nalgene-filtered  
601 extraction buffer (220 mM sucrose, 3.8 mM monopotassium phosphate, 8 mM  
602 dipotassium phosphate, and 10 mM magnesium chloride).

603 Cell suspensions were transferred into two 15 ml Falcon conical tubes on ice  
604 containing 2 g of sterile 3 mm-glass beads and vortexed vigorously 3 times for 30  
605 seconds with a 30-second incubation period on ice between each round of  
606 vortexing.

607 Each lysate was transferred to a new 15 ml Falcon tube on ice and centrifuged at  
608 1200 rpm for 5 minutes at 4°C. Then, the *Wolbachia*-containing supernatant was  
609 transferred to 1.5 mL Eppendorf tubes and centrifuged at 10 000 rpm for 10  
610 minutes at 4°C to pellet *Wolbachia*.

611 The bacterial pellet of one of the Eppendorf tubes was resuspended in 500 µL of  
612 cell culture medium and its content transferred from one tube to another in  
613 order to resuspend all the bacterial pellets and collect them in one final tube.  
614

615 *Generation of the Wolbachia-infected 1182-4Wb and S2R+Wb cell lines.*

616 An extract of *Wolbachia* was transferred into a 25 cm<sup>2</sup> cell culture flask  
617 containing confluent 1182-4 or S2R+ cells in a 4 mL volume of cell culture  
618 medium. After two days cells were passaged twice a week for a 1-month  
619 duration and then, the infection process was repeated to obtain stably infected  
620 1182-4Wb and S2R+Wb cell lines.

621 To follow the infection dynamics, cells were plated on 18 mm x 18 mm coverslips  
622 in a plastic 6-well cell culture plate, and after adherence were fixed in PBS with  
623 3.2% paraformaldehyde for 10 minutes at room temperature, washed for 5

624 minutes with PBS, and incubated for 2 hours at 37°C in the dark with Alexa Fluor  
625 488 phalloidin A12379 (Life technologies) at a 1/50 dilution. After a 5-minute  
626 wash with PBS, coverslips were mounted on glass slides using Fluoroshield with  
627 DAPI and observed with an inverted laser scanning confocal microscope (SP5-  
628 SMD, Leica Microsystems) using a 63x/1.4 HCX PL APO CS oil objective and  
629 images taken with a z-stack interval of 0.5 µm.

630 The viability of 1182-4 versus 1182-4*Wb* and S2R+ versus S2R+*Wb* was  
631 evaluated using an automated cell counter (Countess Invitrogen) relying on a  
632 trypan blue (Life Technologies) exclusion method according to the protocol of  
633 the manufacturer. The cells were passaged the day before the viability  
634 measurements were taken.

635

#### 636 *Immunofluorescence studies.*

637 Cells were plated on 18 mm x 18 mm coverslips in a 6-well cell culture plate 24  
638 hours before fixation in PBS with 3.2% paraformaldehyde for 10 minutes at  
639 room temperature. Next, coverslips were dried and immersed in -20°C pre-  
640 cooled methanol and kept for 10 minutes at -20°C. Then, coverslips were dried  
641 out from residual methanol at room temperature and incubated in a humid  
642 chamber for 10 minutes with PBS, BSA 2%. After a PBS wash, cells were  
643 incubated for 2 hours at 37°C with the primary antibody or antibodies, added as  
644 a 50 µL drop. Following 3 washes of 5 minutes with PBS 1x, cells were incubated  
645 for 2 hours at 37°C with the secondary antibody or antibodies. Then, the cells  
646 were washed 3 times; each for 5 minutes with PBS 1x and mounted using  
647 fluoroshield with DAPI. All primary antibodies were used at a 1/400 dilution:  
648 rabbit polyclonal anti-GM130 antibody ab30637 (Abcam) and rabbit monoclonal

649 anti- K48 linkage polyubiquitin antibody ab140601 (Abcam). Mouse monoclonal  
650 anti-FK2 ubiquitin antibody AB120 (LifeSensors). Rabbit monoclonal anti-  
651 ubiquitin K11 linkage, clone 2A3/2E6 (Millipore). Mouse monoclonal anti-  
652 *Wolbachia* surface protein (BEI resources, NIAID, NIH). Secondary antibodies  
653 were used at a 1/500 dilution. Goat anti-mouse IgG antibody coupled to Alexa  
654 Fluor 488 ab150117 (Abcam), goat anti-rabbit IgG antibody coupled to Cy3  
655 A10520 (Invitrogen). An inverted laser scanning confocal microscope (SP5-SMD;  
656 Leica Microsystems) at a scanning speed of 400 Hz equipped with a 63x/1.4 HCX  
657 PL APO CS oil objective was used to take images with a z-stack= 0.5  $\mu\text{m}$  and in  
658 the case the images needed deconvolution (Deconvolution software: Huygens  
659 Professional version 18.04), the z-stack= 0.2  $\mu\text{m}$ .

660

#### 661 *Drug treatments.*

662 Cells were incubated with tunicamycin (Sigma-Aldrich) at 10  $\mu\text{g}/\text{mL}$  for 48 hours  
663 [62].

664

#### 665 *Live experiments.*

666 Cells were plated on concanavalin A-coated glass bottom fluorodishes 48 hours  
667 before observation. One batch of the S2R+ cell line was treated with tunicamycin  
668 as described above. To stain the ER, the cell culture medium was aspirated, cells  
669 washed with PBS 1x and incubated for 30 minutes at 25°C with 1  $\mu\text{M}$  live ER-  
670 tracker red dye (Molecular Probes) diluted in PBS. The ER-tracker solution was  
671 replaced by a 1/20 000 solution of SYTO-11 (Molecular Probes) DNA dye for 10  
672 minutes at 25°C diluted in the appropriate cell culture medium prior to confocal  
673 microscopy observations. The temperature of the microscope chamber was set

674 at 25°C prior to observation. For concomitant stainings of the ER and the Golgi  
675 apparatus, cells were first incubated for 30 minutes at 4°C with 5 µM of BODIPY  
676 FL C<sub>5</sub>-ceramide (Molecular Probes) in PBS. Next, the cells were rinsed 3 times for  
677 2 minutes and incubated for 30 minutes at 25°C with the live ER-tracker red dye  
678 as described above. For SP5 confocal time-lapse recordings, stacks of three  
679 images, z=0.5µm, were taken each 5 seconds, with a line average =8, in  
680 bidirectional, resonance mode with a SP5 confocal microscope.  
681 To monitor ATF4 activity, cells were plated on concanavalin A-coated glass  
682 bottom fluorodishes. Upon cell adherence, the cells were transfected with a 4E-  
683 BP intron-dsRed reporter plasmid [43] using the lipofectamine kit (Invitrogen)  
684 according to the instructions of the manufacturer. Twenty-four hours post-  
685 transfection, one of the fluorodishes containing *Wolbachia*-free cells was treated  
686 with tunicamycin (10 µg/ml for 48 hours).

687

688

689 *Image analyses.*

690 The image analysis software used is ImageJ version 1.48. The ImageJ macros  
691 were developed in collaboration with the MRI-CRBM-Optics platform,  
692 Montpellier, France and are available upon request. The graphing software used  
693 was GraphPad Prism version 7.00.

694

695

696 *Electron microscopy.*

697 For each cell line, the content of a 25 cm<sup>2</sup> flask at cell confluence, three days after  
698 medium change, was washed and transferred to a 1.5 mL Eppendorf tube and

699 centrifuged at 2000 rpm for 2 minutes at room temperature. The cell pellet was  
700 fixed for 1 hour by resuspension in a 2.5% glutaraldehyde -PHEM solution  
701 pH=7.4. Fixed cells were kept overnight at 4°C. Cells were next rinsed in PHEM  
702 buffer and post-fixed in 0.5% osmic acid for 2 hours at room temperature in the  
703 dark. After two PHEM washes, cells were dehydrated in a graded series of  
704 ethanol solutions (30-100%) before being embedded in EmBed 812 using an  
705 automated microwave tissue processor for electron microscopy (Leica AMW).  
706 Thin sections of 70 nm were collected at different levels of each block using the  
707 Ultracut E microtome (Leica-Reichert). These sections were counterstained with  
708 uranyl acetate and lead citrate and observed using a transmission electron  
709 microscope (Tecnai F20) at 200 kV.

710

#### 711 *RT-qPCR experiments.*

712 RNA extraction was performed in biological triplicates for each sample.  
713 Precisely, the RNA was extracted from confluent flasks of 25 cm<sup>2</sup> containing  
714 approximately 10<sup>6</sup> cells. The culture medium was aspirated and replaced by 1 ml  
715 PBS 1x. Cells were scraped and transferred to 1.5 ml Eppendorf tubes and  
716 centrifuged at 1200 rpm for 5 minutes. Following that, the supernatant was  
717 discarded and the cells were resuspended in 300 µl of the Quick-RNA MicroPrep  
718 kit (Zymo Research) lysis buffer. The next steps were performed according to the  
719 RNA purification protocol detailed in the kits' instructions but the in-column  
720 DNaseI treatment step was omitted and replaced with a TURBO DNase (Ambion)  
721 treatment. RNA was purified using the RNA Clean & Concentrator-5 kit (Zymo  
722 Research). cDNA was produced from 2 µg of RNA using the SuperScript VILO

723 cDNA synthesis kit (Invitrogen) and diluted at 1/25 for the RT-qPCR  
724 experiments.  
725 Primer pairs were selected according to Primer3 version 0.4.0, synthesized by  
726 Eurofins Genomics (S1 table). Primer pairs with an efficiency close to 100% were  
727 selected for qPCR experiments.  
728 RT-qPCR reactions were performed using SYBR Green 10x with Platinum Taq  
729 (Invitrogen). Amplifications were performed using a Mx3000P instrument  
730 (Agilent Technologies) and the MxPro QPCR Software (Agilent Technologies).  
731 The RT-qPCR cycling program consists of a pre-amplification cycle of 2 minutes  
732 at 94°C followed by 40 amplification cycles of 30 seconds at 94°C, 30 seconds at  
733 55°C, and 20 seconds at 72°C. The RT-qPCR cycle ends with a dissociation/melt  
734 cycle of 1 minute at 94°C, 30 seconds at 55°C, and 30 seconds at 94°C.  
735 For each gene, RT-qPCR is performed in technical and biological triplicates.  
736 The changes in expression were calculated according to the  $2^{-\Delta\Delta Ct}$  method [63]  
737 and were plotted using the GraphPad Prism software version 7.0.

738

### 739 **Acknowledgments**

740 We thank Alain Debec for critical reading and providing the 1182-4 cell line,  
741 William Sullivan for providing the JW18 cell line, and the imaging facility MRI,  
742 member of the national infrastructure France-BioImaging supported by the  
743 French National Research Agency (ANR-10-INBS-04, «Investments for the  
744 future»), for developing macros for imaging quantification. The ATF4 activity  
745 reporter is a kind gift of Hyung Don Ryoo.

746

747

## 748 **Figures**

### 749 **Figure 1**

#### 750 **Influence of the genetic background of *Drosophila* cell lines on *Wolbachia*** 751 **wMel titers.**

752 (A) Summary of the experimental approach to infect 1182-4 and S2R+ cell lines.

753 See Materials and Methods. (B to C') Confocal acquisitions of infected cell lines

754 immunostained with an anti-WSP decorating the *Wolbachia* surface in cyan,

755 DAPI is in magenta. (B') and (C') are higher magnifications showing individual

756 cells corresponding to Supplemental movies 1 and 2. Scale bar= 10 microns.

757 (D) Box plot graphs of wMel normalized titers in 1182-4 *Wb* and S2R+ *Wb*,

758 expressed as a percentage of fluorescence surface associated with the anti-WSP

759 staining per cell surface area (n= 181 and median= 11% for 1182-4 *Wb*, and

760 n=215 and median= 71% for S2R+ *Wb*).

761

### 762 **Figure 2**

#### 763 ***Wolbachia* subcellular localization and titer do not influence the Golgi** 764 **apparatus distribution and morphology.**

765 (A) Confocal acquisitions of infected cell lines immunostained with an anti- WSP

766 -decorating the *Wolbachia* surface in cyan-, with GM130 -yellow-. DAPI is in

767 magenta. Scale bars= 10 microns. Dashed lines encompass in S2R+ *Wb* a highly

768 infected cell -left cell- and a infected cell at low level -right cell- (B) Top graphs:

769 Distribution of GM-130 foci sizes in function of the *Wb* density measured on full

770 projections of confocal images (n= 44 cells for 1182-4 *Wb* and n=46 cells for

771 S2R+ *Wb*). Bottom graph: Amount of cis-Golgi expressed as GM130 total signal

772 per cell measured on full projections of confocal images, in infected and non-  
773 infected cell lines (n= 1250 cells for 1182-4; 797 for 1182-4 *Wb*, and n=743 cells  
774 for S2R+ cells and n=864 for S2R+ *Wb*). (C) Transmission electron microscopy  
775 images of the Golgi apparatus in *Wolbachia*-infected cells. The Golgi stacks -  
776 yellow arrows- appear normal (n>10, the red stars indicate the *trans*-Golgi).  
777 Scale bars= 200 nm

778

### 779 **Figure 3**

#### 780 ***Wolbachia* physically interact with the endoplasmic reticulum.**

781 (A) Time-lapse acquisitions at a surface focal plane in a 1182-4 *Wb* cell stained  
782 with the DNA dye SYTO 11 -magenta- to highlight *Wb*, and an ER tracker -cyan-.  
783 At t=0 second, grey arrows point to peripheral *Wb* clusters that are not in close  
784 contact with the ER. The orange arrow points towards some *Wb* remaining in  
785 close contact with the ER during the time lapse duration. The dotted yellow  
786 circle highlights some *Wb* located within ER tubules. A single *Wb* within an ER  
787 tubule is tracked by the plain yellow arrowhead, and its previous position is  
788 indicated by an empty yellow arrowhead (i.e. at t=15s). Similarly, the movement  
789 of a single *Wb* surrounded by an ER-derived membrane is tracked by green  
790 arrowheads (t=15s to t=35s). See the corresponding supplemental movie 3. (B)  
791 Scoring of *Wb*- ER interactions, observed with SYTO 11 and the ER tracker in  
792 1182-*Wb* and S2R+ *Wb* cells, in random focal planes of n= 18 and n= 12 cells  
793 respectively. Bacteria co-localized with ER tubules, or surrounded by an ER  
794 tracker-positive membrane were counted as "ER-tracker positive". (C) The  
795 different interactions between *Wb* and the ER are highlighted on these confocal  
796 images, with clusters of *Wb* not in contact in 1182-4 *Wb* -see inset-. The



797 following rows are different examples in S2R+ cells showing i) *Wb* in close  
798 contact with the ER, ii) a *Wb* cluster composed of individual *Wb* surrounded with  
799 an ER tracker-positive membrane -yellow arrowheads-; iii) and in rare instances  
800 all individual *Wb* of the cell being surrounded with an ER tracker-positive  
801 membrane.

802

#### 803 **Figure 4**

#### 804 ***Wolbachia* impact the ER distribution but not its structure in both S2R+ *Wb*** 805 **and 1182-4 *Wb* cells.**

806 (A) Live imaging of S2R+ -top rows-, and S2R+ *Wb* -bottom rows- stained with  
807 SYTO 11 -magenta- and the ER tracker -cyan-. For S2R+ *Wb* cells, dashed lines  
808 encompass the nuclei, yellow arrowheads the colocalization of *Wb* and ER  
809 tubules, and blue arrows point to the clustered ER. The last row is a cortical focal  
810 plane showing the intense ER tubular network associated with *Wb*. Scale bar=  
811 10µm. (B) Occurrence of clustered ER in various cell lines, with the addition of  
812 the S2R+ cell line treated with Tunicamycin at 10µg/mL for 48 hours. For S2R+  
813 n= 179 ; S2R+ *Wb* n= 123; S2R+ with Tunicamycin n=227; 1182-4 n=76; 1182-4  
814 *Wb* n=120. (C) Electron micrograph of S2R+ and S2R+ *Wb*. The top row  
815 highlights the presence of a darker ER mass -red arrow-, numerous *Wb* are  
816 visible in between the nucleus and the ER cluster. The second row is a series of  
817 consecutive enlargements of an ER cluster in the vicinity of vacuoles containing  
818 multiple *Wb* -orange arrowheads pointing to the vacuolar membrane-. Green  
819 arrows and the red arrow indicate the tubular ER and piled ER membranes  
820 respectively. Cyan arrows point towards ER membranes encompassing vacuoles  
821 containing multiple *Wb* in the cell periphery. The last image depicts a single

822 vacuole with multiple *Wb*, tightly surrounded by rough ER -cyan arrow-. Scale  
823 bar= 500 nm. (D) The ER inter-membrane distance in the different cell lines.  
824 Measurements were taken on high magnification electron micrographs as  
825 depicted -red line-, and the average thickness varies from 42 to 56 nm. For S2R+  
826 n=75 ; S2R+ *Wb* n=43; 1182-4 n=35; 1182-4 *Wb* n=58. (E) Live imaging of S2R+  
827 and S2R+ *Wb* cells stained simultaneously with ER -cyan- and Golgi -red-  
828 fluorescent trackers. Upper panels are lower magnifications and lower panels  
829 are higher magnifications. Arrowheads point towards Golgi foci. Scale bar=10 $\mu$ m.  
830

### 831 **Figure 5**

#### 832 **Polyubiquitin linkages associated with ERAD and proteosomal degradation** 833 **are not increased in presence of *Wolbachia*.**

834 (A) Confocal acquisitions of the infected and non-infected 1182-4 and S2R+ cell  
835 lines stained with DAPI -magenta- and the monoclonal antibody FK2 -yellow-,  
836 recognizing all mono- and poly-ubiquitylated proteins, but not free ubiquitin.  
837 Dashed lines encompass individual cells, scale bar=10  $\mu$ m. (B) Box plot graphs  
838 showing the FK2-positive foci quantification, expressed as total areas per full  
839 confocal projections in individual cells. For 1182-4 n=218; 1182-4 *Wb* n=106;  
840 S2R+ n= 212; S2R+ *Wb* n= 195 cells. (C) Linear regression of the FK2-positive  
841 total area per 1182-*Wb* cell, in function of the *Wb* titer, established on the DAPI  
842 signal (cf. Materials and Methods), n=104 cells. (D) Confocal acquisitions of the  
843 infected and non-infected 1182-4 and S2R+ cell lines stained with WSP -  
844 magenta- and an anti- K11-linkage polyubiquitin -yellow-. The dashed line  
845 highlights the cell area of a heavily *Wb*-infected S2R+ *Wb* cell, containing a mass  
846 of ER, physically excluding the endosymbionts. Scale bar= 10 $\mu$ m.

847

848 **Figure 6**

849 ***Wolbachia* do not induce ER stress.**

850 (A) Schematic summary of the UPR and ERAD pathways. The color code  
851 highlights the three UPR pathways and the ERAD and is identical to what  
852 employed in (B). (B) Genes tested by quantitative PCR, in presence of  
853 tunicamycin -top graphs-, or *Wolbachia* -bottom graphs-. UPR genes are on the  
854 left and ERAD genes on the right. Gene expression fold changes are represented,  
855 and variations comprised between a 2-fold increased expression -"2" above the  
856 dashed line- and a 2-fold decreased expression - "0.5" are considered  
857 insignificant. (C) S2R+ cells transfected with the ATF4 activity reporter E-BP  
858 intron dsRed; after a 48hr-long treatment with tunicamycin at 10 µg/mL, or in  
859 presence of *Wb*. DNA is stained with SYTO-11 -green-. In absence of *Wb*, nuclei  
860 incorporate the dye at various levels, while in presence of *Wb*, the dye stains  
861 preferentially the endosymbionts compared to the nuclei, highlighted with a red  
862 dashed line. Two adjacent transfected cells are shown in presence of  
863 tunicamycin, and only one for S2R+ and S2R+ *Wb*. The graph represents  
864 quantifications of the dsRed fluorescence levels in each conditions. For S2R+  
865 n=14; S2R+ with tunicamycin n=11; and for S2R+ *Wb* n=15.

866

867

868 **Supporting information**

869

870 **S1 Fig. Infection of naive cell lines**

871 (A) Infection dynamics of 1182-4 cells challenged with purified wMel *Wolbachia*.  
872 Scoring of intracellular *Wb* was performed on confocal images of fixed cells at the  
873 various time points represented on the graph, with a phalloidin staining -yellow-  
874 to visualize the cortical actin in order to count the number of intracellular *Wb*  
875 only, per individual cells. *Wb* are detected as DAPI bright cytoplasmic foci(-  
876 magenta-, i.e. green arrow pointing at a single bacterium at an early time point).  
877 Scale bar= 10  $\mu$ m, n=100 cells per time point, counted in randomly acquired  
878 images per coverslip. (B) Cell survival established with Trypan blue. Analyses  
879 were performed 24 hr-post medium change.

880

881 **S2 Fig. Anti- K48-linkage polyubiquitin immunostainings.**

882 Confocal acquisitions of the infected and non-infected 1182-4 and S2R+ cell lines  
883 stained with WSP -magenta- and an anti- K48-linkage polyubiquitin -yellow-.

884

885 **S1 Movie. A *Wolbachia*-infected 1182-4 cell.**

886 A 1182-4 cell infected by JW18-derived wMel. This animation shows the  
887 different Z stacks composing the corresponding confocal merged image in Fig.1.

888 WSP decorates the *Wolbachia* in Cyan and DAPI is in magenta.

889

890

891 **S2 Movie. A *Wolbachia*-infected S2R+ cell.**

892 A S2R+ cell infected by JW18-derived wMel. This animation shows the different Z  
893 stacks composing the corresponding confocal merged image in Fig.1. WSP

894 decorates the *Wolbachia* in Cyan and DAPI is in magenta.

895

896 **S3 Movie. Time lapse recording of *Wolbachia* and the ER in a 1182-4*Wb***  
897 **cell.**

898 Time lapse acquisitions of a surface focal plane in an 1182-4 *Wb* cell. Images are  
899 taken each 5 seconds, and the cell is stained with the live DNA dye SYTO 11 to  
900 track the *Wolbachia* -magenta- and the ER-tracker is in cyan.

901

902 **S1 Table. List of selected primers for qPCR analyses.**

903

904

905 **References**

906

- 907 1. Werren JH, Baldo L, Clark ME. *Wolbachia*: master manipulators of  
908 invertebrate biology. *Nat Rev Microbiol.* 2008;6: 741–751.  
909 doi:10.1038/nrmicro1969
- 910 2. Pietri JE, DeBruhl H, Sullivan W. The rich somatic life of *Wolbachia*.  
911 *Microbiologyopen.* 2016;5: 923–936. doi:10.1002/mbo3.390
- 912 3. Unckless RL, Boelio LM, Herren JK, Jaenike J. *Wolbachia* as populations  
913 within individual insects: Causes and consequences of density variation in  
914 natural populations. *Proc R Soc B Biol Sci.* 2009;276: 2805–2811.  
915 doi:10.1098/rspb.2009.0287
- 916 4. Toomey ME, Panaram K, Fast EM, Beatty C, Frydman HM. Evolutionarily  
917 conserved *Wolbachia*-encoded factors control pattern of stem-cell niche  
918 tropism in *Drosophila* ovaries and favor infection. *Proc Natl Acad Sci U S A.*  
919 2013;110: 10788–93. doi:10.1073/pnas.1301524110
- 920 5. Chrostek E, Teixeira L. Mutualism Breakdown by Amplification of

- 921           Wolbachia Genes. PLoS Biol. 2015;13: 1–22.  
922           doi:10.1371/journal.pbio.1002065
- 923   6.       Serbus LR, Sullivan W. A cellular basis for Wolbachia recruitment to the  
924       host germline. PLoS Pathog. 2007;3: 1930–1937.  
925       doi:10.1371/journal.ppat.0030190
- 926   7.       Slatko BE, Taylor MJ, Foster JM. The Wolbachia endosymbiont as an anti-  
927       filarial nematode target. Symbiosis. 2010;51: 55–65. doi:10.1007/s13199-  
928       010-0067-1
- 929   8.       Jiggins FM. The spread of Wolbachia through mosquito populations. PLoS  
930       Biol. 2017;15: 1–6. doi:10.1371/journal.pbio.2002780
- 931   9.       Teixeira L, Ferreira Á, Ashburner M. The Bacterial Symbiont Wolbachia  
932       Induces Resistance to RNA Viral Infections in *Drosophila melanogaster*.  
933       Keller L, editor. PLoS Biol. 2008;6: e1000002.  
934       doi:10.1371/journal.pbio.1000002
- 935   10.      M. L, Hedges, Jeremy C. Brownlie, Scott L. O’Neill KNJ. Wolbachia and Virus  
936       Protection in Insects. Science (80- ). 2008;322: 702.
- 937   11.      Lindsey ARI, Bhattacharya T, Newton ILG, Hardy RW. Conflict in the  
938       intracellular lives of endosymbionts and viruses: A mechanistic look at  
939       Wolbachia-mediated pathogen-blocking. Viruses. 2018;10: 1–29.  
940       doi:10.3390/v10040141
- 941   12.      Rancès E, Ye YH, Woolfit M, McGraw EA, O’Neill SL. The relative  
942       importance of innate immune priming in Wolbachia-mediated dengue  
943       interference. PLoS Pathog. 2012;8. doi:10.1371/journal.ppat.1002548
- 944   13.      Molloy J, Sinkins S. Wolbachia Do Not Induce Reactive Oxygen Species-  
945       Dependent Immune Pathway Activation in *Aedes albopictus*. Viruses.

- 946 2015;7: 4624–4639. doi:10.3390/v7082836
- 947 14. Foster J, Ganatra M, Kamal I, Ware J, Makarova K, Ivanova N, et al. The  
948 *Wolbachia* Genome of *Brugia malayi*: Endosymbiont Evolution within a  
949 Human Pathogenic Nematode. *PLoS Biol.* 2005;3: e121.  
950 doi:10.1371/journal.pbio.0030121
- 951 15. Wu M, Sun L V., Vamathevan J, Riegler M, Deboy R, Brownlie JC, et al.  
952 Phylogenomics of the reproductive parasite *Wolbachia pipientis* wMel: A  
953 streamlined genome overrun by mobile genetic elements. *PLoS Biol.*  
954 2004;2: 327–341. doi:10.1371/journal.pbio.0020069
- 955 16. Molloy JC, Sommer U, Viant MR, Sinkins SP. *Wolbachia* Modulates Lipid  
956 Metabolism in *Aedes albopictus* Mosquito. 2016;82: 3109–3120.  
957 doi:10.1128/AEM.00275-16.Editor
- 958 17. Caragata EP, Rancès E, Hedges LM, Gofton AW, Johnson KN, O’Neill SL, et  
959 al. Dietary Cholesterol Modulates Pathogen Blocking by *Wolbachia*. *PLoS*  
960 *Pathog.* 2013;9. doi:10.1371/journal.ppat.1003459
- 961 18. Geoghegan V, Stainton K, Rainey SM, Ant TH, Dowle AA, Larson T, et al.  
962 Perturbed cholesterol and vesicular trafficking associated with dengue  
963 blocking in *Wolbachia*-infected *Aedes aegypti* cells. *Nat Commun. Springer*  
964 *US*; 2017;8: 526. doi:10.1038/s41467-017-00610-8
- 965 19. White PM, Serbus LR, Debec A, Codina A, Bray W, Guichet A, et al. Reliance  
966 of *wolbachia* on high rates of host proteolysis revealed by a genome-wide  
967 RNAi screen of *Drosophila* cells. *Genetics.* 2017;205: 1473–1488.  
968 doi:10.1534/genetics.116.198903
- 969 20. Schwarz DS, Blower MD. The endoplasmic reticulum: Structure, function  
970 and response to cellular signaling. *Cell Mol Life Sci. Springer Basel*;

- 971 2016;73: 79–94. doi:10.1007/s00018-015-2052-6
- 972 21. Romero-Brey I, Bartenschlager R. Endoplasmic reticulum: The favorite  
973 intracellular niche for viral replication and assembly. *Viruses*. 2016;8: 1–  
974 26. doi:10.3390/v8060160
- 975 22. Celli J, Tsolis RM. Bacteria , the ER and the Unfolded Protein Response :  
976 Friends or. *Nat Rev Microbiol*. 2015;13: 71–82.  
977 doi:10.1038/nrmicro3393.Bacteria
- 978 23. Sano R, Reed JC. ER stress-induced cell death mechanisms. *Biochim*  
979 *Biophys Acta - Mol Cell Res*. Elsevier B.V.; 2013;1833: 3460–3470.  
980 doi:10.1016/j.bbamcr.2013.06.028
- 981 24. Cherbas L, Willingham A, Zhang D, Yang L, Zou Y, Eads BD, et al. The  
982 transcriptional diversity of 25 *Drosophila* cell lines. *Genome Res*. 2011;21:  
983 301–314. doi:10.1101/gr.112961.110
- 984 25. Debec A. Haploid cell cultures of *Drosophila melanogaster*. *Nature*. 1978.  
985 pp. 255–256. doi:10.1038/274255a0
- 986 26. Debec A, Abbadie C. The acentriolar state of the *Drosophila* cell lines 1182.  
987 *Biol Cell*. 1989;67: 307–311. doi:10.1111/j.1768-322X.1989.tb00876.x
- 988 27. Yanagawa S, Lee J, Ishimoto A, Chem JB. Identification and  
989 Characterization of a Novel Line of *Drosophila* Schneider S2 Cells That  
990 Respond to Wingless Signaling Identification and Characterization of a  
991 Novel Line of *Drosophila* Schneider S2 Cells That Respond to Wingless  
992 Signaling \*. *Jounral Biol Chem*. 1998;273: 32353–32359.
- 993 28. Grobler Y, Yun CY, Kahler DJ, Bergman CM, Lee H, Oliver B, et al. Whole  
994 genome screen reveals a novel relationship between *Wolbachia* levels and  
995 *Drosophila* host translation. *bioRxiv*. 2018; doi:10.1101/380485



- 996 29. Bhattacharya T, Newton ILG, Hardy RW. Wolbachia elevates host  
997 methyltransferase expression to block an RNA virus early during infection.  
998 PLoS Pathog. 2017;13: 1–22. doi:10.1371/journal.ppat.1006427
- 999 30. White PM, Pietri JE, Debec A, Russell S, Patel B, Sullivan W. Mechanisms of  
1000 Horizontal Cell-to-Cell Transfer of Wolbachia spp. in *Drosophila*  
1001 *melanogaster*. Drake HL, editor. Appl Environ Microbiol. 2017;83: e03425-  
1002 16. doi:10.1128/AEM.03425-16
- 1003 31. Rainey SM, Martinez J, McFarlane M, Juneja P, Sarkies P, Lulla A, et al.  
1004 Wolbachia Blocks Viral Genome Replication Early in Infection without a  
1005 Transcriptional Response by the Endosymbiont or Host Small RNA  
1006 Pathways. PLoS Pathog. 2016;12: 1–22.  
1007 doi:10.1371/journal.ppat.1005536
- 1008 32. van Bergeijk P, Hoogenraad CC, Kapitein LC. Right Time, Right Place:  
1009 Probing the Functions of Organelle Positioning. Trends Cell Biol. Elsevier  
1010 Ltd; 2016;26: 121–134. doi:10.1016/j.tcb.2015.10.001
- 1011 33. Romano JD, Coppens I. Host Organelle Hijackers: A similar modus  
1012 operandi for *Toxoplasma gondii* and *Chlamydia trachomatis*: Co-infection  
1013 model as a tool to investigate pathogenesis. Pathog Dis. 2013;69: 72–86.  
1014 doi:10.1111/2049-632X.12057
- 1015 34. Cho KO, Kim GW, Lee OK. Wolbachia bacteria reside in host Golgi-related  
1016 vesicles whose position is regulated by polarity proteins. PLoS One.  
1017 2011;6. doi:10.1371/journal.pone.0022703
- 1018 35. Heuer D, Lipinski AR, Machuy N, Karlas A, Wehrens A, Siedler F, et al.  
1019 *Chlamydia* causes fragmentation of the Golgi compartment to ensure  
1020 reproduction. Nature. Nature Publishing Group; 2009;457: 731–735.

- 1021 doi:10.1038/nature07578
- 1022 36. Casper-Lindley C, Kimura S, Saxton DS, Essaw Y, Simpson I, Tan V, et al.  
1023 Rapid Fluorescence-Based Screening for Wolbachia Endosymbionts in  
1024 Drosophila Germ Line and Somatic Tissues. *Appl Environ Microbiol.*  
1025 2011;77: 4788–4794. doi:10.1128/AEM.00215-11
- 1026 37. Hwang J, Qi L. Quality Control in the Endoplasmic Reticulum: Crosstalk  
1027 between ERAD and UPR pathways. *Trends Biochem Sci.* Elsevier Ltd;  
1028 2018;43: 593–605. doi:10.1016/J.TIBS.2018.06.005
- 1029 38. Swatek KN, Komander D. Ubiquitin modifications. *Cell Res.* Nature  
1030 Publishing Group; 2016;26: 399–422. doi:10.1038/cr.2016.39
- 1031 39. Xu P, Duong DM, Seyfried NT, Cheng D, Xie Y, Rush J, et al. Quantitative  
1032 Proteomics Reveals the Function of Unconventional Ubiquitin Chains in  
1033 Proteasomal Degradation. 2009;137: 133–145.  
1034 doi:10.1016/j.cell.2009.01.041. Quantitative
- 1035 40. Locke M, Toth J, Petroski M. K11- and K48-Linked Ubiquitin Chains  
1036 Interact with p97 during Endoplasmic Reticulum-Associated Degradation.  
1037 *Biochem J.* 2014;459: 205–216.  
1038 doi:10.1016/j.pestbp.2011.02.012. Investigations
- 1039 41. Bravo R, Parra V, Gatica D, Rodriguez AE, Torrealba N, Paredes F, et al.  
1040 Endoplasmic Reticulum and the Unfolded Protein Response. *Scientifica.*  
1041 2013. pp. 215–290. doi:10.1016/B978-0-12-407704-1.00005-1
- 1042 42. Chow CY, Wolfner MF, Clark AG. Using natural variation in *Drosophila* to  
1043 discover previously unknown endoplasmic reticulum stress genes. *Proc*  
1044 *Natl Acad Sci.* 2013;110: 9013–9018. doi:10.1073/pnas.1307125110
- 1045 43. Kang MJ, Vasudevan D, Kang K, Kim K, Park JE, Zhang N, et al. 4E-BP is a

- 1046 target of the GCN2 – ATF4 pathway during *Drosophila* development and  
1047 aging. *J Cell Biol.* 2016;216: 1–15. doi:10.1083/jcb.201511073
- 1048 44. Baldrige G, Higgins L, Witthuhn B, Markowski T, Armien A, Fallon A, et al.  
1049 Proteomic analysis of a mosquito host cell response to persistent  
1050 *Wolbachia* infection. *Res Microbiol.* 2017;168: 609–625.  
1051 doi:10.1016/j.resmic.2017.04.005.For
- 1052 45. Fallon AM, Witthuhn BA. Proteasome activity in a naïve mosquito cell line  
1053 infected with *Wolbachia pipientis* wAlbB. *Vitr Cell Dev Biol - Anim.*  
1054 2009;45: 460–466. doi:10.1007/s11626-009-9193-6
- 1055 46. Frydman HM, Li JM, Robson DN, Wieschaus E. Somatic stem cell niche  
1056 tropism in *Wolbachia*. *Nature.* 2006;441: 509–512.  
1057 doi:10.1038/nature04756
- 1058 47. Landmann F, Bain O, Martin C, Uni S, Taylor MJ, Sullivan W. Both  
1059 asymmetric mitotic segregation and cell-to-cell invasion are required for  
1060 stable germline transmission of *Wolbachia* in filarial nematodes. *Biol*  
1061 *Open.* 2012;1: 536–547. doi:10.1242/bio.2012737
- 1062 48. Fenollar F, Maurin M, Raoult D. *Wolbachia pipientis* growth kinetics and  
1063 susceptibilities to 13 antibiotics determined by immunofluorescence  
1064 staining and real-time PCR. *Antimicrob Agents Chemother.* 2003;47:  
1065 1665–1671. doi:10.1128/AAC.47.5.1665-1671.2003
- 1066 49. Celli J, Tsolis RM. Bacteria , the ER and the Unfolded Protein Response :  
1067 Friends or. 2016;13: 71–82. doi:10.1038/nrmicro3393.Bacteria
- 1068 50. Santos JC, Enninga J. At the crossroads: communication of bacteria-  
1069 containing vacuoles with host organelles. *Cell Microbiol.* 2016;18: 330–  
1070 339. doi:10.1111/cmi.12567

- 1071 51. Celli J. The changing nature of the Brucella-containing vacuole. Cell  
1072 Microbiol. 2015;17: 951–958. doi:10.1111/cmi.12452
- 1073 52. Ridsdale A. Cholesterol Is Required for Efficient Endoplasmic Reticulum-  
1074 to-Golgi Transport of Secretory Membrane Proteins. Mol Biol Cell.  
1075 2006;17: 1593–1605. doi:10.1091/mbc.E05-02-0100
- 1076 53. Hanada K. Ceramide Transport from the Endoplasmic Reticulum to the  
1077 Trans Golgi Region at Organelle Membrane Contact Sites. 2017. pp. 69–81.  
1078 doi:10.1007/978-981-10-4567-7\_5
- 1079 54. Mullen TD, Obeid LM. Ceramide and Apoptosis: Exploring the Enigmatic  
1080 Connections between Sphingolipid Metabolism and Programmed Cell  
1081 Death. Anticancer Agents Med Chem. 2012;12: 340–363.  
1082 doi:10.2174/187152012800228661
- 1083 55. Young MM, Wang H-G. Sphingolipids as Regulators of Autophagy and  
1084 Endocytic Trafficking. Advances in Cancer Research. 2018. pp. 27–60.  
1085 doi:10.1016/bs.acr.2018.04.008
- 1086 56. Logue SE, Cleary P, Saveljeva S, Samali A. New directions in ER stress-  
1087 induced cell death. Apoptosis. 2013;18: 537–546. doi:10.1007/s10495-  
1088 013-0818-6
- 1089 57. Shore GC, Papa FR, Oakes SA. Signaling cell death from the endoplasmic  
1090 reticulum stress response. Curr Opin Cell Biol. 2011;23: 143–149.  
1091 doi:10.1016/j.ceb.2010.11.003
- 1092 58. Agrawal S, Chung DWD, Ponts N, van Dooren GG, Prudhomme J, Brooks CF,  
1093 et al. An Apicoplast Localized Ubiquitylation System Is Required for the  
1094 Import of Nuclear-encoded Plastid Proteins. PLoS Pathog. 2013;9.  
1095 doi:10.1371/journal.ppat.1003426

- 1096 59. Cornejo E, Schlaermann P, Mukherjee S. How to rewire the host cell: A  
1097 home improvement guide for intracellular bacteria. *J Cell Biol.* 2017;216:  
1098 3931–3948. doi:10.1083/jcb.201701095
- 1099 60. Serbus LR, White PM, Silva JP, Rabe A, Teixeira L, Albertson R, et al. The  
1100 Impact of Host Diet on Wolbachia Titer in *Drosophila*. *PLoS Pathog.*  
1101 2015;11: 1–25. doi:10.1371/journal.ppat.1004777
- 1102 61. Serbus LR, Landmann F, Bray WM, White PM, Ruybal J, Lokey RS, et al. A  
1103 Cell-Based Screen Reveals that the Albendazole Metabolite, Albendazole  
1104 Sulfone, Targets Wolbachia. *PLoS Pathog.* 2012;8.
- 1105 62. Plongthongkum N, Kullawong N, Panyim S, Tirasophon W. Ire1 regulated  
1106 XBP1 mRNA splicing is essential for the unfolded protein response (UPR)  
1107 in *Drosophila melanogaster*. *Biochem Biophys Res Commun.* 2007;354:  
1108 789–794. doi:10.1016/j.bbrc.2007.01.056
- 1109 63. Livak KJ, Schmittgen TD. Analysis of relative gene expression data using  
1110 real-time quantitative PCR and the  $2^{-\Delta\Delta CT}$  method. *Methods.* 2001;25:  
1111 402–408. doi:10.1006/meth.2001.1262
- 1112
- 1113
- 1114
- 1115
- 1116
- 1117
- 1118
- 1119
- 1120

1121

1122

1123

1124

1125

1126

1127

1128

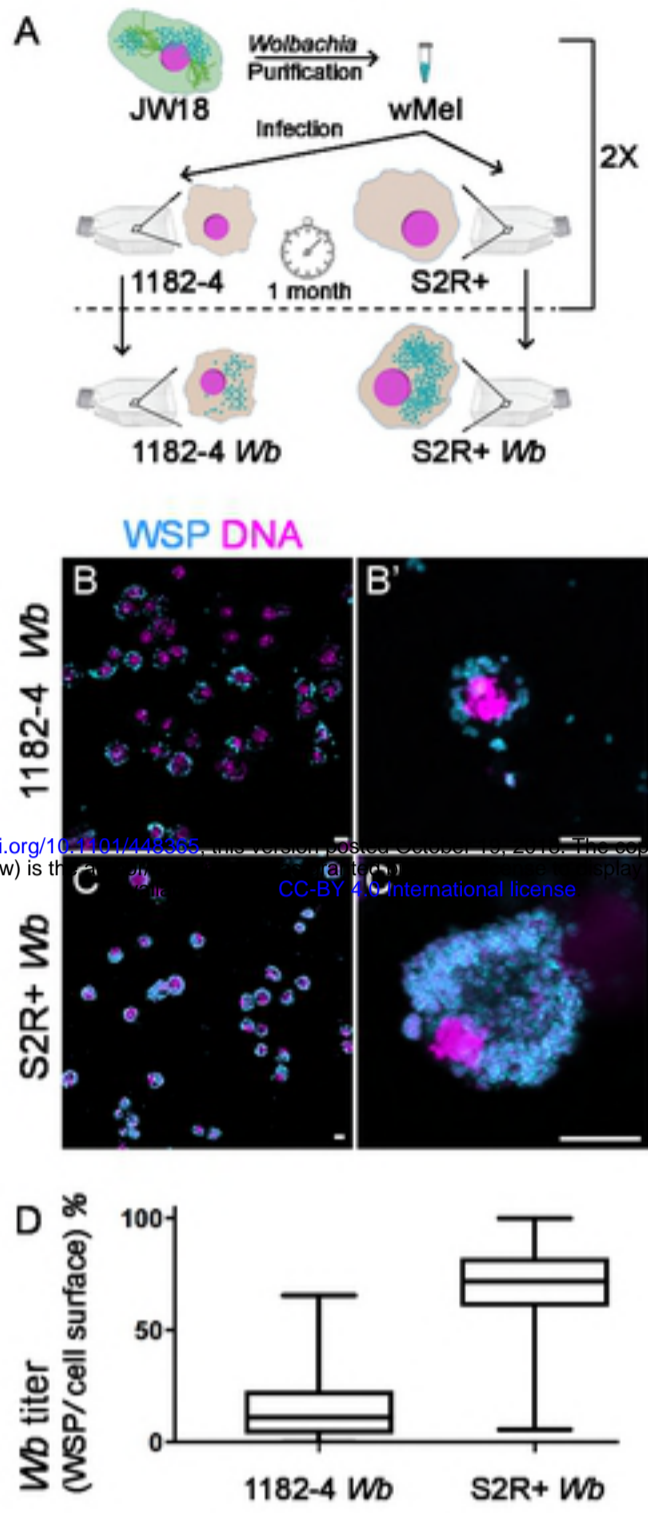

bioRxiv preprint doi: <https://doi.org/10.1101/448365>; this version posted October 16, 2016. The copyright holder for this preprint (which was not certified by peer review) is the author/funder, who has granted bioRxiv a license to display the preprint in perpetuity. It is made available under aCC-BY 4.0 International license.

Figure 1

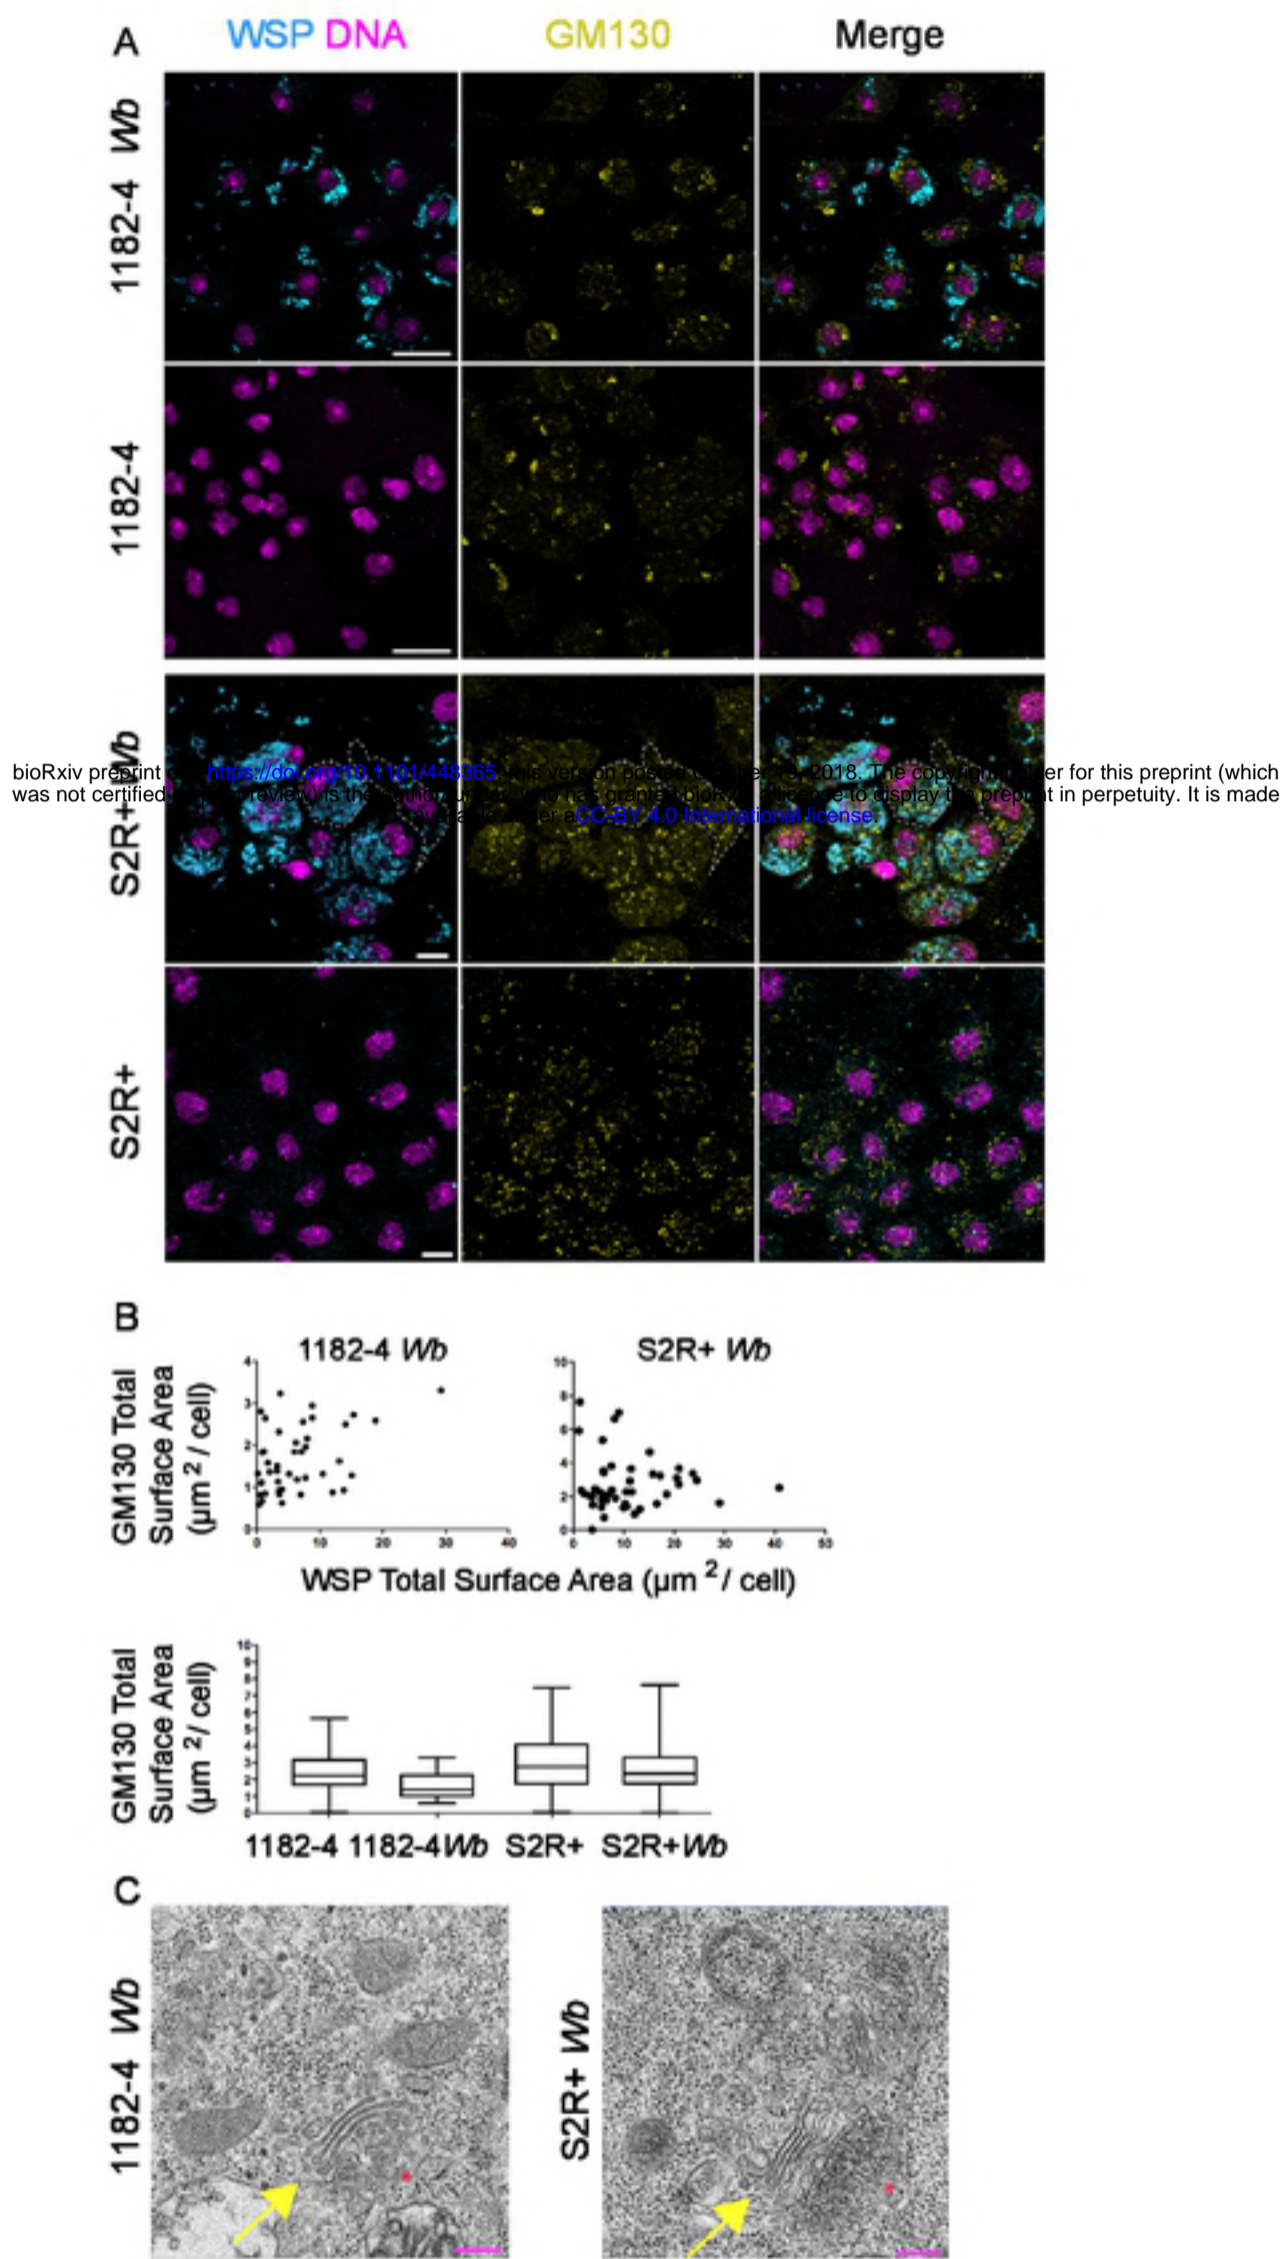

Figure 2



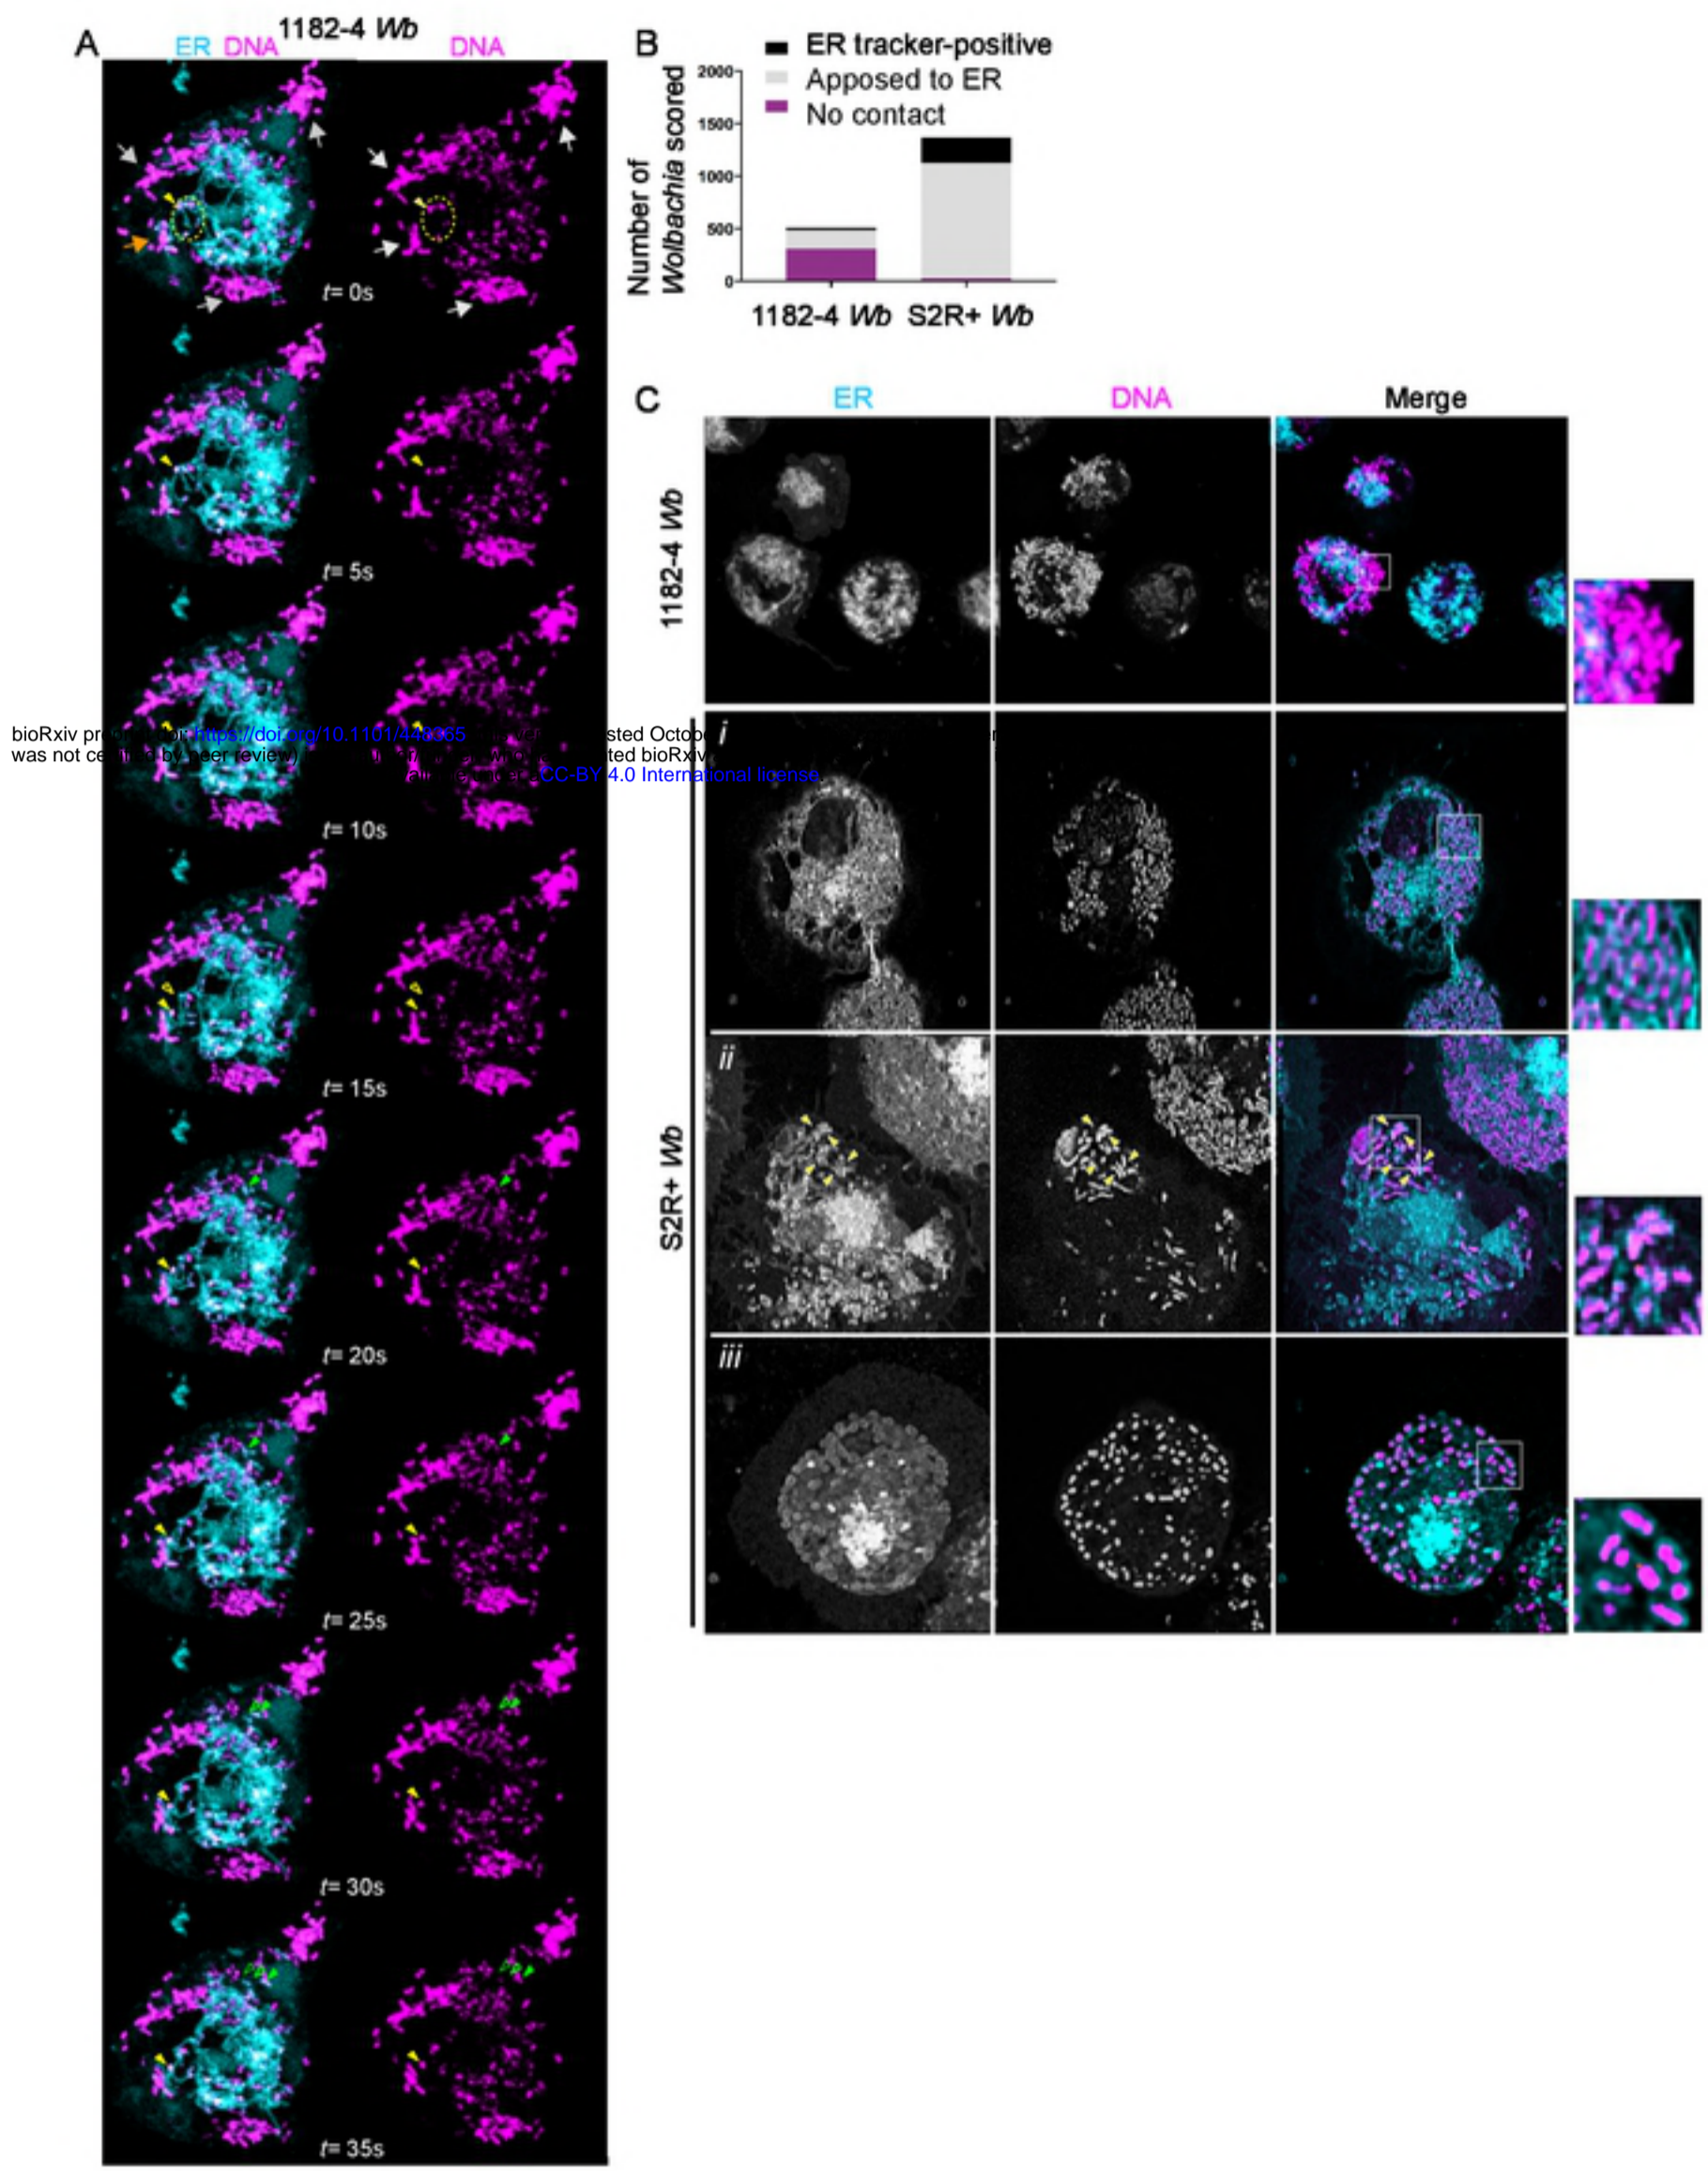

Figure 3

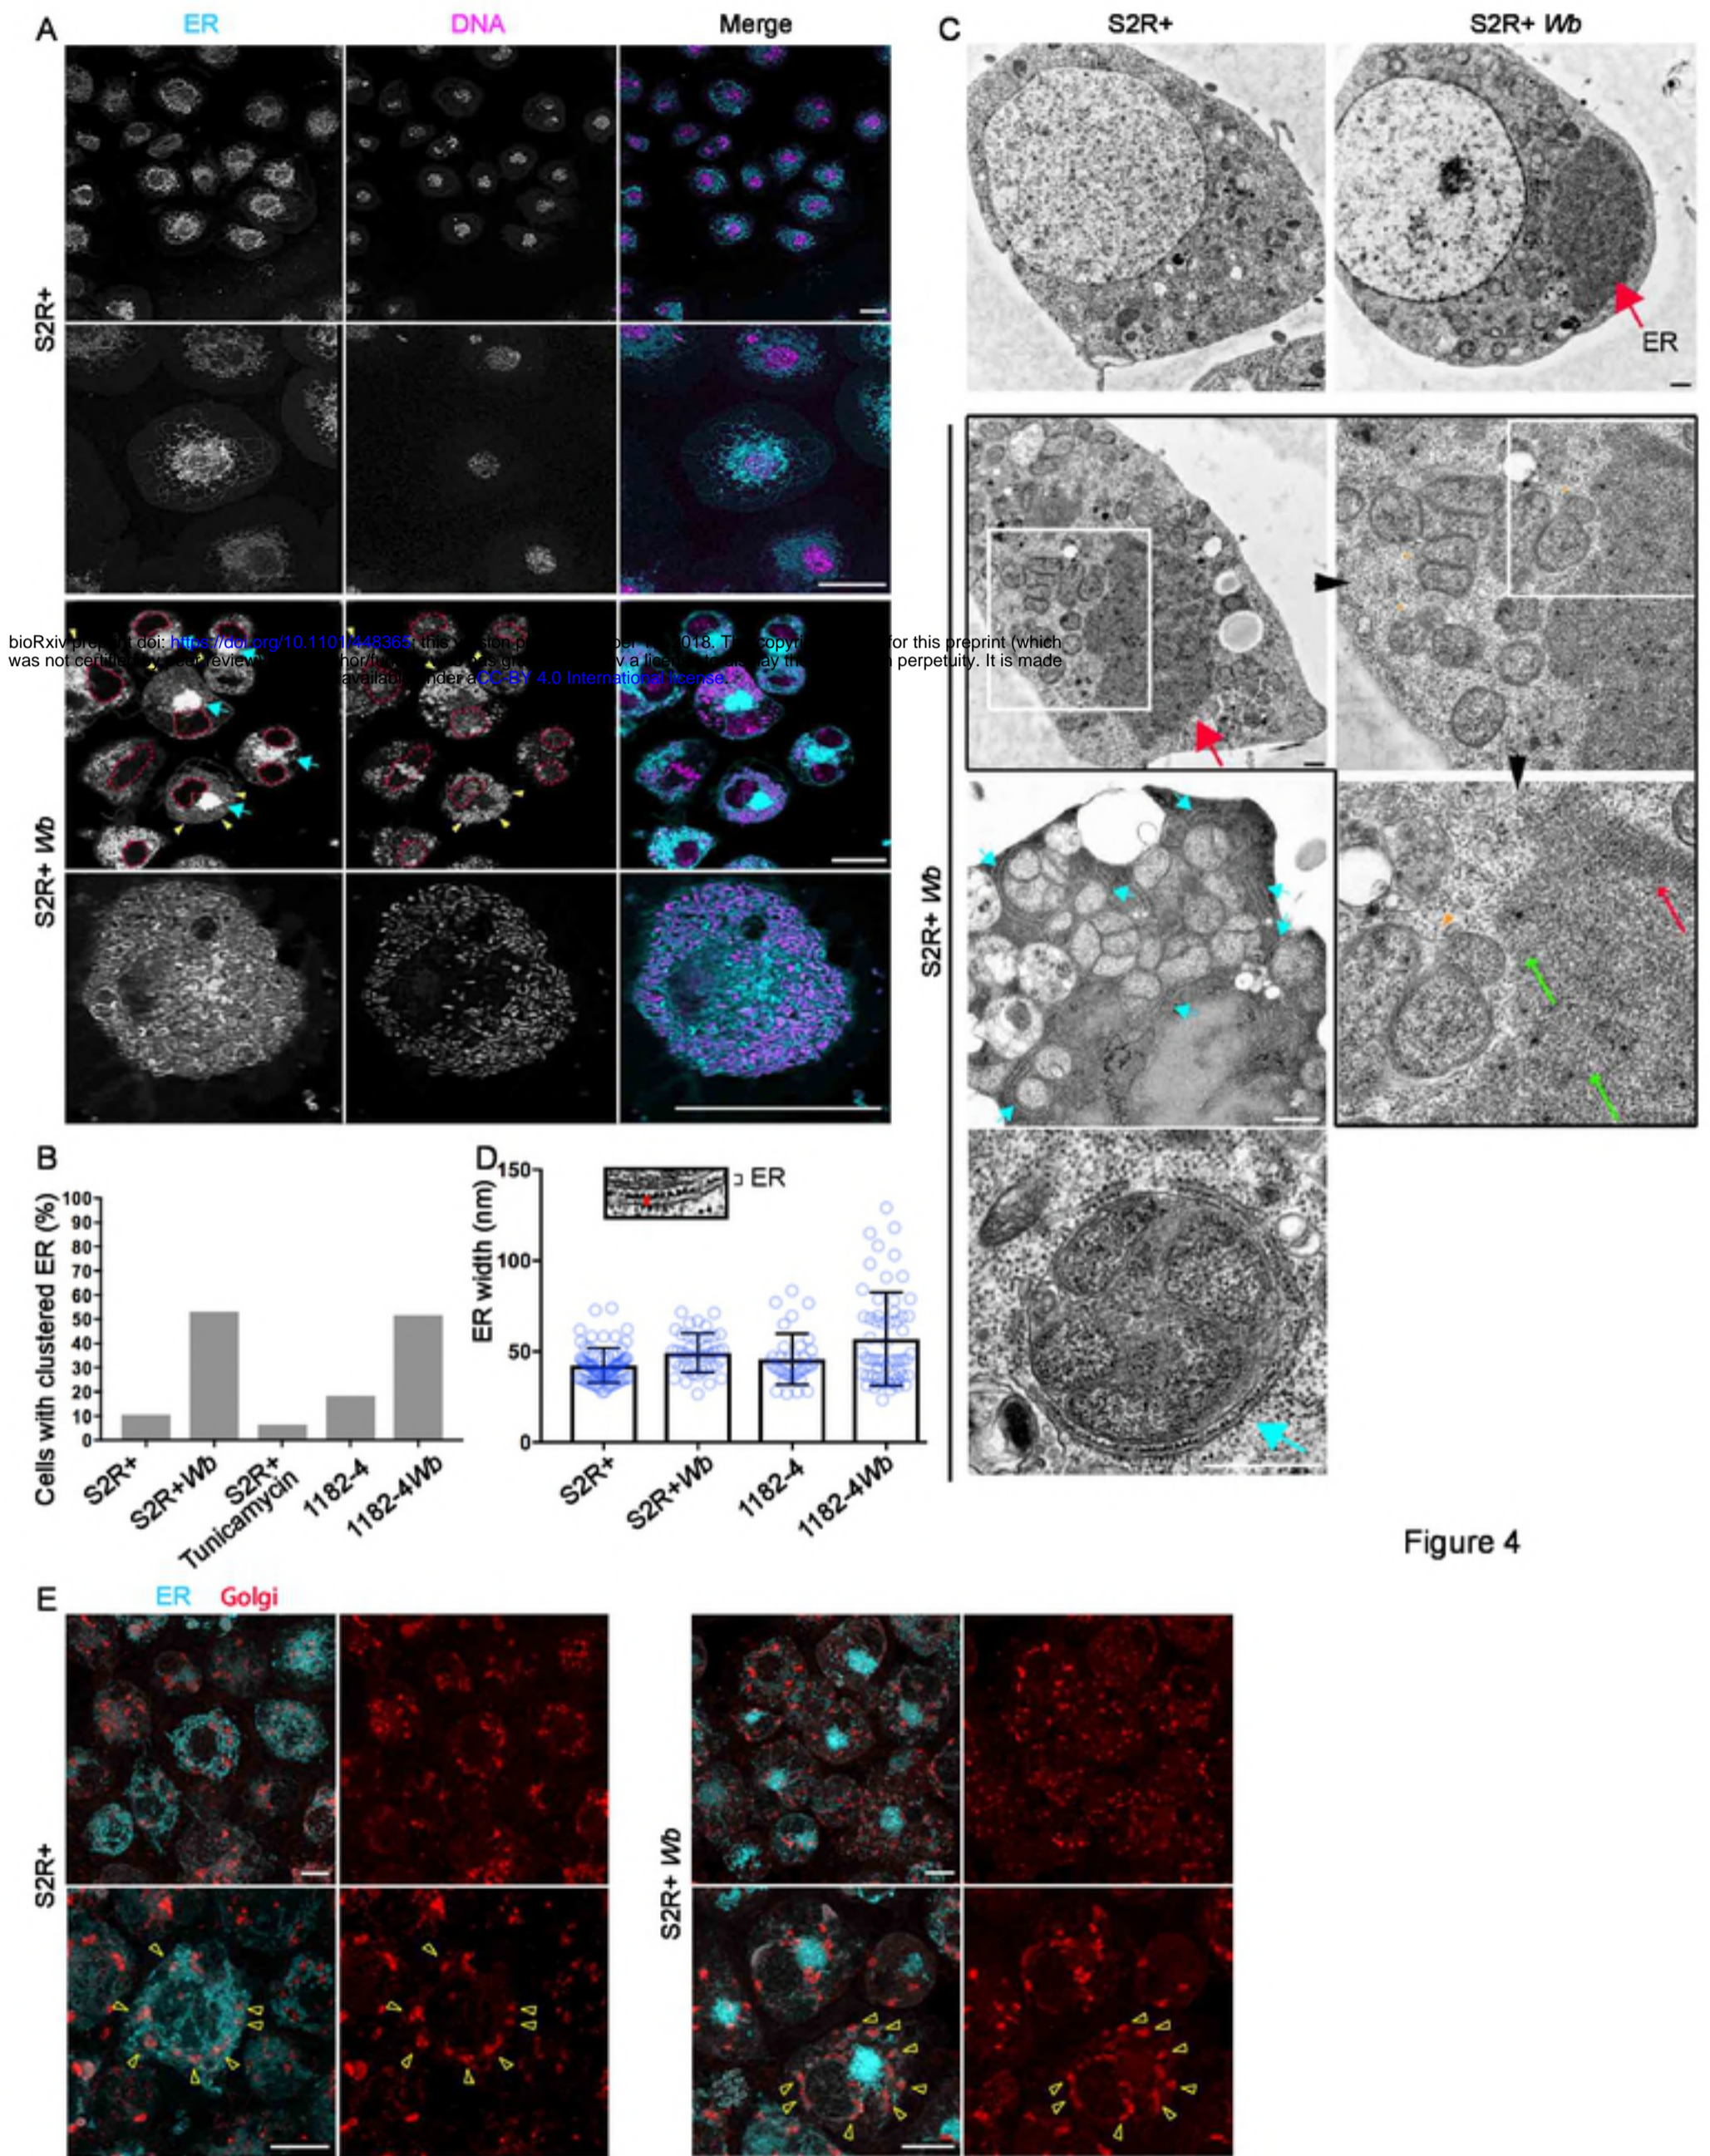

Fig4

bioRxiv preprint doi: <https://doi.org/10.1101/448365>; this version posted September 11, 2018. The copyright holder for this preprint (which was not certified by peer review) is the author/funder, who has granted bioRxiv a license to display the preprint in perpetuity. It is made available under aCC-BY 4.0 International license.

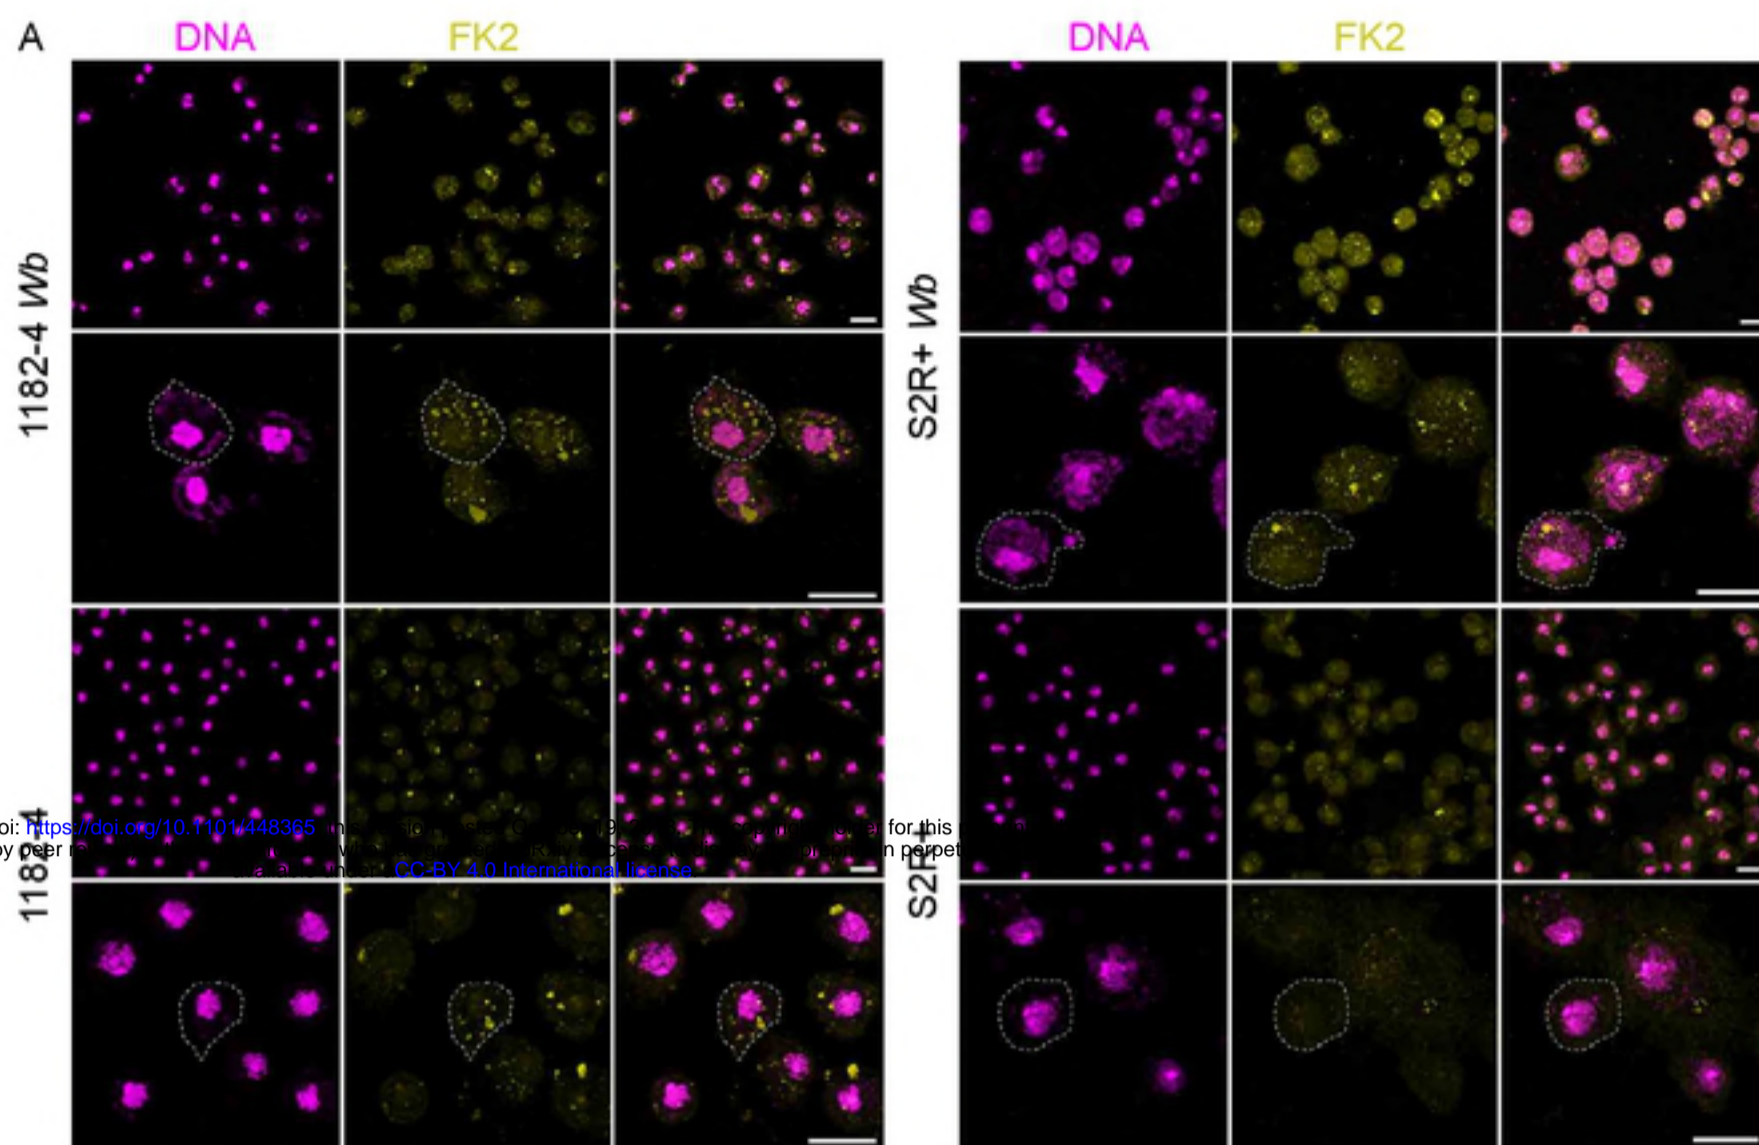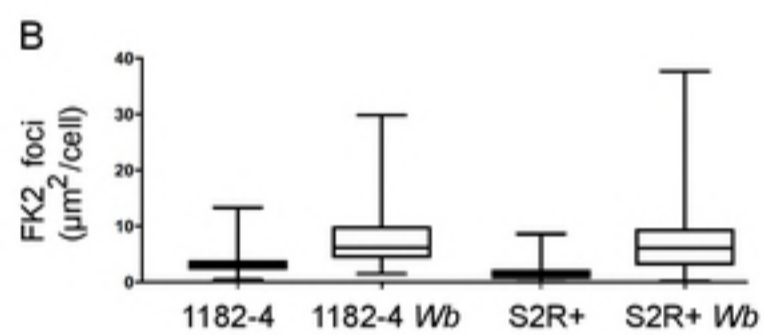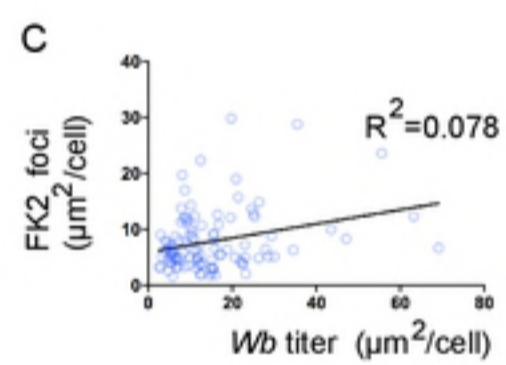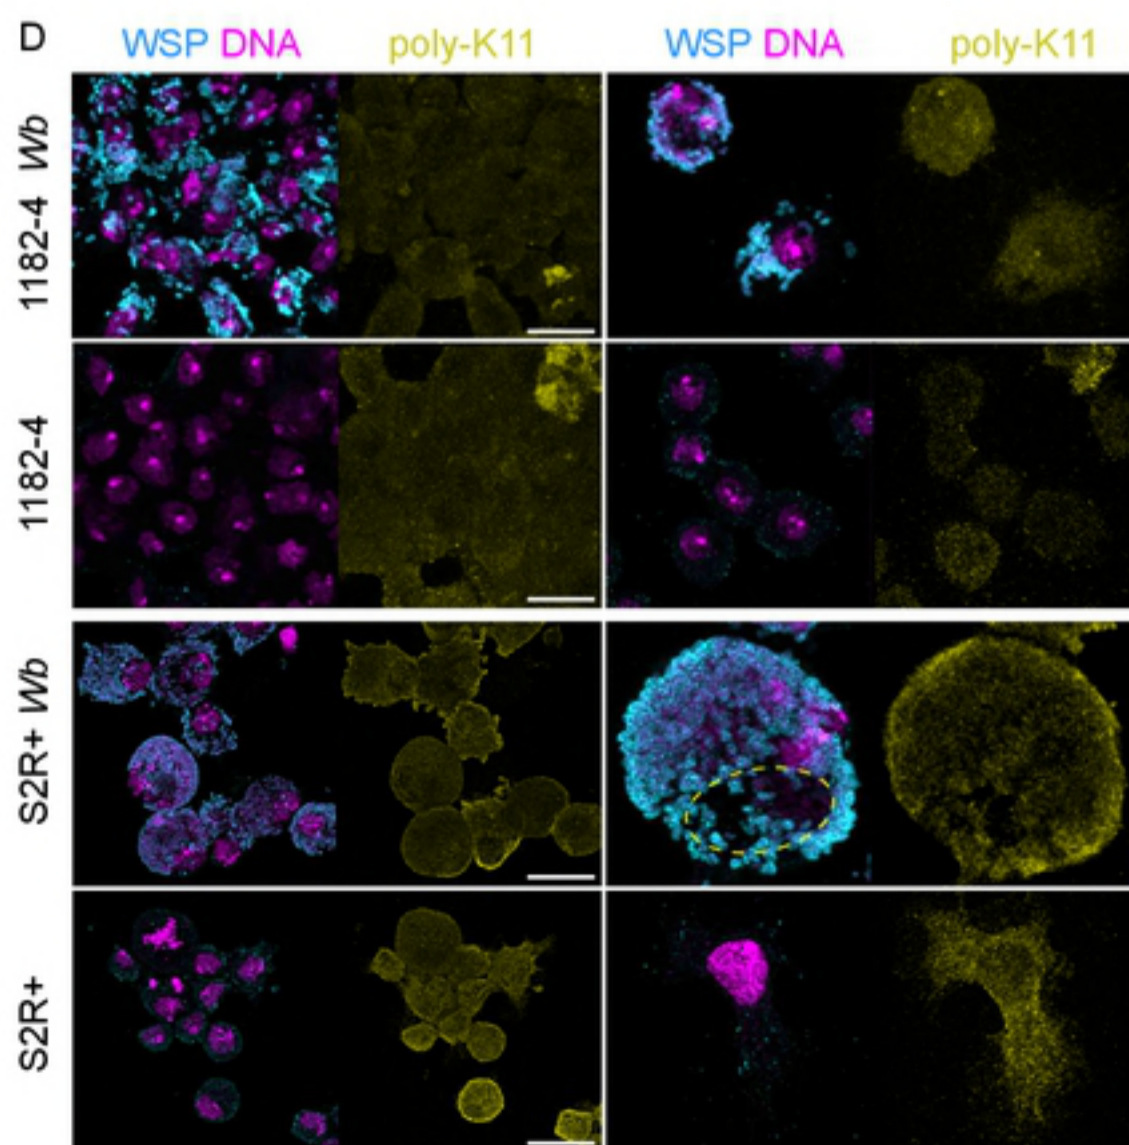

Figure 5

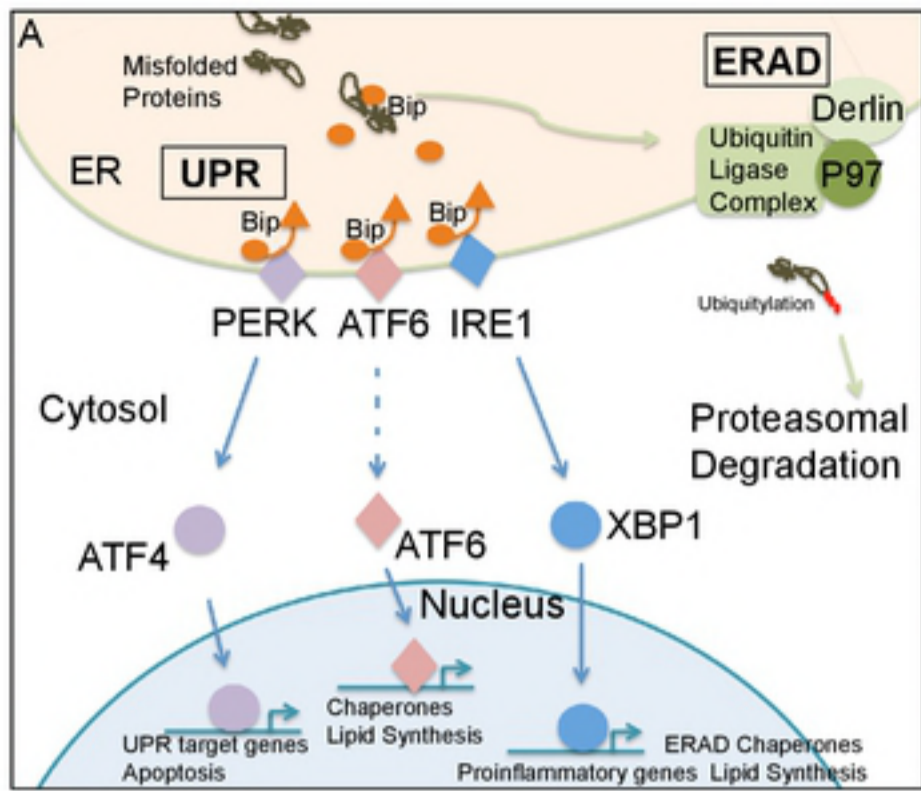

bioRxiv preprint doi: <https://doi.org/10.1101/443365>; this version posted October 19, 2018. The copyright holder for this preprint (which was not certified by peer review) is the author/funder, who has granted bioRxiv a license to display the preprint in perpetuity. It is made available under aCC-BY 4.0 International license.

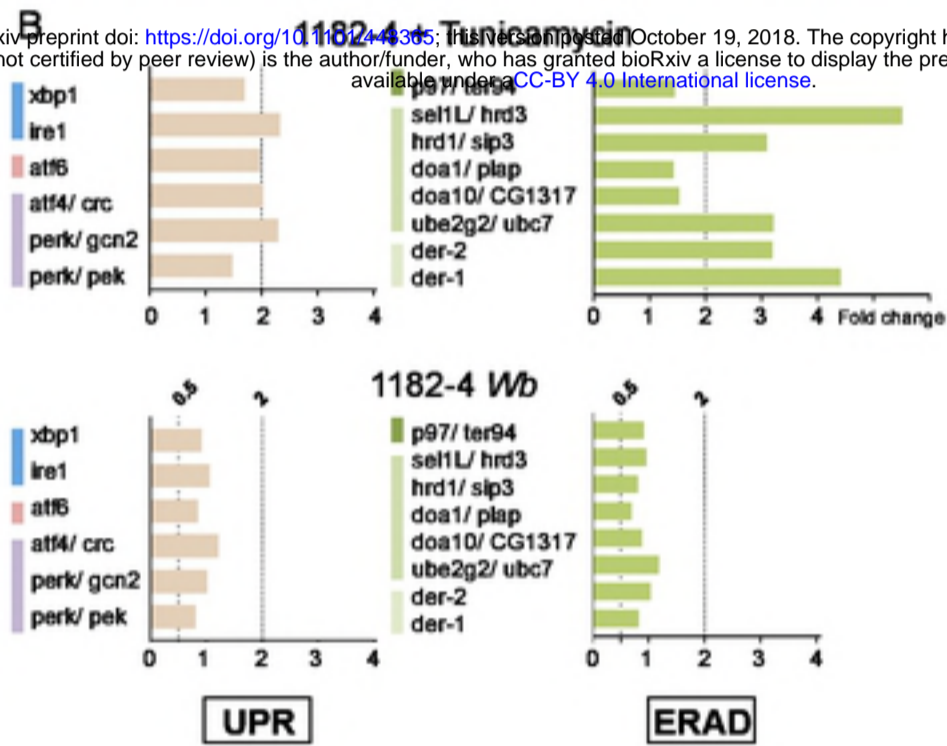

Figure 6

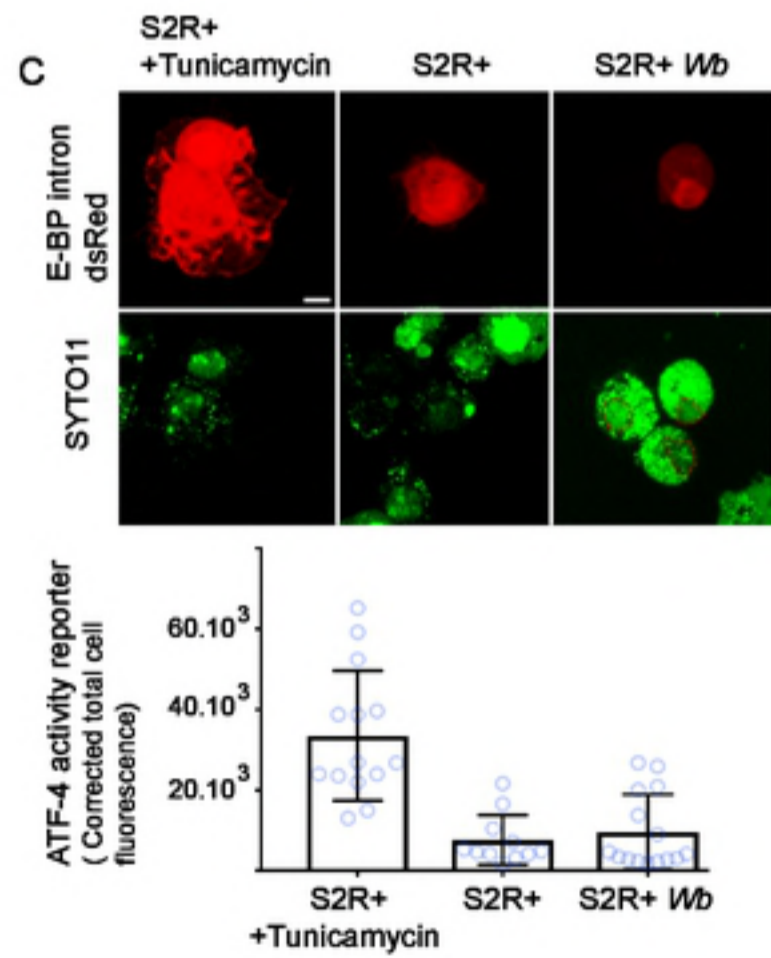

Source: http://biorxiv.org/content/10.1101/448365v1.full.pdf
